# Supplementary material for: Unlocking the PIP-box: A peptide library reveals interactions that drive high-affinity binding to human PCNA
Source: PubMed Central journal article supplement — J Biol Chem. 2021 May 11;296:100773. doi: 10.1016/j.jbc.2021.100773 (PMC8191301; doi:10.1016/j.jbc.2021.100773), 2021-05-11
Supplement: mmc1.pdf [file mmc1.pdf]

## Electronic Supplementary Information

# Unlocking the PIP-box: A peptide library reveals interactions that drive high affinity binding to human PCNA

Aimee J. Horsfall, Beth A. Vandborg, Wioleta Kowalczyk, Theresa Chav, Denis B. Scanlon, Andrew D. Abell\* and John B. Bruning\*

### ABBREVIATIONS

**ACN**, acetonitrile; **Ala (A)**, alanine; **Arg (R)**, arginine; **Asn (N)**, asparagine; **Asp (D)**, aspartic acid; **Boc**, tert-butoxycarbonyl; **Cys (C)**, cysteine; **DCM**, dichloromethane; **DEAE**, diethylethanolamine; **DIC**, *N,N'*-diisopropylcarbodiimide; **DIPEA**, *N,N'*-diisopropylethylamine; **DMF**, *N,N'*-dimethylformamide; **DDOT**: 2,2'-(ethylenedioxy)diethanethiol; **DTT**, dithiothreitol; **E. Coli**, Escherichia Coli; **EDC**, 1-ethyl-3-(3-diethylaminopropyl)carbodiimide; **EDTA**, ethylenediaminetetraacetic acid; **ESI-TOF**, Electrospray Ionisation Time of Flight; **Fmoc**, 9-fluorenylmethoxycarbonyl; **Gln (Q)**, glutamine; **Glu (E)**, glutamic acid; **Gly (G)**, glycine; **HATU**, (1-[bis(dimethylamino)methylene]-1H-1,2,3-triazolo[4,5-b]pyridinium 3-oxide hexafluorophosphate; **HEPES**, 4-(2-hydroxyethyl)-1-piperazineethanesulfonic acid; **His (H)**, histidine; **HOBt**, 1-hydroxybenzotriazole; **HPLC**: High Performance Liquid Chromatography; **HRMS**: High Resolution Mass Spectrometry; **Ile (I)**, isoleucine; **IPTG**, isopropyl  $\beta$ -D-1-thiogalactopyranoside; **LB**: Lennox broth; **LCMS**: Liquid Chromatography Mass Spectrometry; **Leu (L)**, leucine; **Lys (K)**, lysine; **Met (M)**, methionine; **NHS**, N-hydroxysuccinimide; **Pbf**: 2,2,4,6,7-pentamethylidihydrobenzofuran-5-sulfonyl; **PCNA**, Proliferating Cell Nuclear Antigen; **Phe (F)**, phenylalanine; **Pro (P)**, proline; **RP-HPLC**: Reverse-Phase High Performance Liquid Chromatography; **SDS**, Sodium Dodecyl Sulfate; **Ser (S)**, serine; **SPPS**: Solid-Phase Peptide Synthesis; **tBu**: tert-butyl; **TFA**: trifluoroacetic acid; **Thr (T)**, threonine; **TIPS**: triisopropylsilane; **TNBS**, 2,4,6-trinitrobenzenesulfonic acid (picrylsulfonic acid); **Tris**, trisaminomethane; **Trp (W)**, tryptophan; **Trt**, trityl; **Tyr (Y)**, tyrosine; **Val (V)**, valine;

### TABLE OF CONTENTS

|                                                                                                                                |           |
|--------------------------------------------------------------------------------------------------------------------------------|-----------|
| <b>SYNTHESIS &amp; CHARACTERISATION OF PEPTIDES</b>                                                                            | <b>2</b>  |
| Table S1: Peptide characterisation data                                                                                        | 4         |
| <b>SPR:</b>                                                                                                                    | <b>5</b>  |
| Table S2: Peptide SPR data against hPCNA.                                                                                      | 5         |
| <b>COCRYSTAL EXPERIMENTS</b>                                                                                                   | <b>6</b>  |
| Table S3: Data collection and refinement statistics of hPCNA bound with p21 $\mu$ , and hPCNA bound with p21 $\mu$ -F150Y.     | 6         |
| Figure S1: Co-crystal structure of p21 $\mu$ bound to PCNA monomer.                                                            | 7         |
| Table S4: Secondary Interaction Summary for co-crystal structure of p21 $\mu$ with hPCNA.                                      | 7         |
| Figure S2: Co-crystal structure of p21 $\mu$ -F150Y bound to PCNA monomer.                                                     | 8         |
| Table S5: Secondary Interaction Summary for co-crystal structure of p21 $\mu$ -F150Y with hPCNA.                               | 8         |
| <b>COMPUTATIONAL MODELLING OF PCNA MONOMERS BOUND TO P21<math>\mu</math> PEPTIDES</b>                                          | <b>9</b>  |
| Figure S3: Computationally modelled structure of p21 $\mu$ -M147I on the PIP-box binding site of a hPCNA monomer.              | 9         |
| Table S6: Secondary Interaction Summary for computationally modelled structured of p21 $\mu$ -M147I with hPCNA.                | 9         |
| Figure S4: Computationally modelled structure of p21 $\mu$ -FY150/151YF on the PIP-box binding site of a hPCNA monomer.        | 10        |
| Table S7: Secondary Interaction Summary for computationally modelled structured of p21 $\mu$ -FY150/151YF with hPCNA.          | 10        |
| Figure S5: Computationally modelled structure of p21 $\mu$ -S146R on the PIP-box binding site of a hPCNA monomer.              | 11        |
| Table S8: Secondary Interaction Summary for computationally modelled structured of p21 $\mu$ -S146R with hPCNA.                | 11        |
| Figure S6: Computationally modelled structure of p21 $\mu$ -D149E on the PIP-box binding site of a hPCNA monomer.              | 12        |
| Table S9: Secondary Interaction Summary for computationally modelled structured of p21 $\mu$ -D149E.                           | 12        |
| Figure S7: Computationally modelled structure of p21 $\mu$ -pol $\delta_{666}$ on the PIP-box binding site of a hPCNA monomer. | 13        |
| Table S10: Secondary Interaction Summary for computationally modelled structured of p21 $\mu$ -pol $\delta_{666}$ with hPCNA.  | 13        |
| Figure S8: Computationally modelled structure of p21 $\mu$ -Pogo on the PIP-box binding site of a hPCNA monomer.               | 14        |
| Table S11: Secondary Interaction Summary for computationally modelled structured of p21 $\mu$ -Pogo with hPCNA.                | 14        |
| Figure S9: Computationally modelled structure of p21 $\mu$ -PARG on the PIP-box binding site of a hPCNA monomer.               | 15        |
| Table S12: Secondary Interaction Summary for computationally modelled structured of p21 $\mu$ -PARG with hPCNA.                | 15        |
| Figure S10: Computationally modelled structure of p21 $\mu$ -pol I on the PIP-box binding site of a hPCNA monomer              | 16        |
| Table S13: Secondary Interaction Summary for computationally modelled structured of p21 $\mu$ -pol I with hPCNA.               | 16        |
| Figure S11: Computationally modelled structure of p21 $\mu$ -RFC on the PIP-box binding site of a hPCNA monomer.               | 17        |
| Table S14: Secondary Interaction Summary for computationally modelled structured of p21 $\mu$ -RFC with hPCNA.                 | 17        |
| Figure S12: Computationally modelled structure of p21 $\mu$ -RD1 on the PIP-box binding site of a hPCNA monomer.               | 18        |
| Table S15: Secondary Interaction Summary for computationally modelled structured of p21 $\mu$ -RD1 with hPCNA                  | 18        |
| Figure S13: Computationally modelled structure of p21 $\mu$ -RD2 on the PIP-box binding site of a hPCNA monomer.               | 19        |
| Table S16: Secondary Interaction Summary for computationally modelled structured of p21 $\mu$ -RD2 with hPCNA.                 | 19        |
| Figure S14: Computationally modelled structure of p21 $\mu$ -RD3 on the PIP-box binding site of a hPCNA monomer                | 20        |
| Table S17: Secondary Interaction Summary for computationally modelled structured of p21 $\mu$ -RD3 with hPCNA.                 | 20        |
| <b>ANALYSIS OF STRUCTURES</b>                                                                                                  | <b>21</b> |
| Table S18: Root-mean-squared deviation (RMSD) values of modified p21 $\mu$ .                                                   | 21        |
| Table S19: Buried Surface Area (BSA) of modified p21 $\mu$ .                                                                   | 21        |
| <b>COMPARISON OF STRUCTURES TO NATIVE SEQUENCES</b>                                                                            | <b>22</b> |
| Figure S15: Overlaid structures of p21 $\mu$ :PIP-box hybrid (blue) and native PIP-box peptide (yellow)                        | 22        |
| Table S20: Root-mean-squared deviation (RMSD) values of alternative PIP-box modified peptides                                  | 23        |
| Table S21: Number of interactions for p21 $\mu$ :hybrid peptides compared to native analogues                                  | 23        |
| <b>REFERENCES</b>                                                                                                              | <b>24</b> |

## SYNTHESIS & CHARACTERISATION OF PEPTIDES

Unless otherwise indicated, all starting materials were purchased from commercial sources and used without further purification. All peptides were synthesised by the Fmoc/tBu solid-phase peptide synthesis using one of three protocols detailed below, with all L-amino acids (unless otherwise specified) purchased from Chem-Impex Int'l.: Fmoc-Ala-OH, Fmoc-Arg(Pbf)-OH, Fmoc-Asp(tBu)-OH, Fmoc-Asn(Trt)-OH, Fmoc-Cys(Trt)-OH, Fmoc-Gln(Trt)-OH, Fmoc-Glu(tBu)-OH, Fmoc-Gly-OH, Fmoc-His(Trt)-OH, Fmoc-Ile-OH, Fmoc-Leu-OH, Fmoc-Lys(Boc)-OH, Fmoc-Met-OH, Fmoc-Thr(tBu)-OH, Fmoc-Tyr(tBu)-OH, Fmoc-Trp(Boc)-OH, Fmoc-Ser(tBu)-OH, Fmoc-Phe-OH, Fmoc-Pro-OH, Fmoc-Val-OH. Peptides were subsequently cleaved from the resin (and simultaneously globally deprotected) and purified per '*Cleavage from solid-support, isolation & purification*'. Purity of all compounds was confirmed by analytical RP-HPLC on an Agilent 1260 HPLC equipped with a Phenomenex Luna C18(2) column (250 x 4.6 mm) over a gradient of 5-50% B (15 min) and visualised at 220 nm. High-resolution mass spectra were collected using an Agilent 6230 ESI-TOF via direct injection in ACN with 0.1% formic acid as the running buffer. Characterisation data for all peptides is recorded in Table S1.

### Peptide Synthesis:

All peptides were synthesised using one of the following methods, excepting ten peptides that were purchased from Shanghai Royobiotec at >95% purity, with purity & identity confirmed on receipt by HPLC and HRMS. *Purchased peptides*: p21<sub>μ</sub>-M147L, p21<sub>μ</sub>-M147A, p21<sub>μ</sub>-M147W, p21<sub>μ</sub>-M147V, p21<sub>μ</sub>-Q144D, p21<sub>μ</sub>-Q144M, p21<sub>μ</sub>-Q144S, p21<sub>μ</sub>-FY150/151YF, p21<sub>μ</sub>-p15, and p21<sub>μ</sub>-Cdt1.

### Liberty Blue Synthesis:

All peptides were synthesised by the Fmoc/tBu solid-phase peptide synthesis protocol on a CEM Liberty Blue Automated Microwave Peptide Synthesiser (CEM Corp., Matthews, NC, USA) using the standard manufacturer's conditions. The peptides were assembled on 0.1 mmol scale on Chem Impex Rink Amide AM resin (0.47 mmol/g) or Mimotopes Rink Amide resin (0.456 mmol/g). The resin was initially swollen in DCM (10 mL, 15 min) and then the resin washed with DMF (2 × 5 mL) and transferred to the microwave reaction vessel. The resin-bound Fmoc-groups were deprotected with a mixture of 20% piperidine and 0.1 M OxymaPure in DMF using the standard microwave deprotection method with a maximum temperature of 90°C. Couplings were performed with Fmoc-protected amino-acids (0.2 M in DMF, 5 equiv), OxymaPure (1 M in DMF, 5 equiv) and DIC (0.5 M in DMF, 5 equiv) under the 'Standard Coupling' microwave method with a maximum temperature of 90°C, except for coupling of Fmoc-His(Trt)-OH which was coupled using a maximum 50°C 10 min coupling procedure; and Fmoc-Arg(Pbf)-OH which used the default 'Arginine Double Coupling' microwave method which included two couplings steps – the first at room temperature and the second at a maximum of 75°C. Following assembly of the desired sequence the N-terminal protecting group was removed. The resin was then removed from the synthesiser, washed with DCM (3 × 5 mL) and then diethyl ether (3 × 5 mL) and air dried with suction. The peptides were then cleaved from the resin according to the protocol '*Cleavage from solid-support, isolation & purification*' detailed below.

*Peptides synthesised by this method*: p21<sub>139-160</sub><sup>‡</sup>, p21<sub>μ</sub>, p21<sub>μ</sub>-F150Y, p21<sub>μ</sub>-Y151F, p21<sub>μ</sub>-F150H, p21<sub>μ</sub>-M147I

<sup>‡</sup> The N-terminal glycine was subjected to a standard double coupling cycle as initial syntheses indicated incomplete incorporation at this position. Please note, this sequence is particularly prone to aspartimide formation.

### Prelude Synthesis:

Peptides were assembled using a Protein Technologies Prelude® Peptide synthesiser. Chem Impex Rink Amide resin (0.1 mmol, 0.47 mmol/g) was preswollen in DCM for 15 min, and washed with DMF (3 × 10 mL, 1.5 min). The Fmoc-protecting group was removed by treatment with 20% piperidine (3 × 8 mL, 7 min) and the resin washed with DMF (5 × 10 mL, 1.5 min). An amino-acid was then coupled by addition of the required Fmoc-amino-acid (7.5 equiv, 150 mM in DMF), HCTU (5 equiv, 0.5 M in DMF) and DIPEA (10 equiv, 1 M in DMF) and bubbled with nitrogen for 15 min before the solution was drained, and a fresh coupling solution added to the resin and bubbled with nitrogen for 10 min. The solution was drained and the resin washed with DMF (4 × 8 mL, 1.5 min). Fmoc deprotection and coupling steps were repeated until the desired sequence was achieved, and the final N-terminal Fmoc group deprotected. The resin was then removed from the synthesiser and washed

with DCM (3 × 5 mL) and then diethyl ether (3 × 5 mL) and air dried with suction. The peptides were then cleaved from the resin according to the protocol '*Cleavage from solid-support, isolation & purification*' detailed below.

*Peptides synthesised by this method:* p21<sub>μ</sub>-Q144K, p21<sub>μ</sub>-Q144N, p21<sub>μ</sub>-T145K, p21<sub>μ</sub>-T145R, p21<sub>μ</sub>-S146K, p21<sub>μ</sub>-S146R, p21<sub>μ</sub>-T148D, p21<sub>μ</sub>-T148E, p21<sub>μ</sub>-D149E, p21<sub>μ</sub>-TS145/146KK, p21<sub>μ</sub>-TS145/146RK, p21<sub>μ</sub>-TS145/145KR, p21<sub>μ</sub>-TS145/146RR, p21<sub>μ</sub>-TD148/149EE, p21<sub>μ</sub>-TS148/149DE, p21<sub>μ</sub>-RNaseH2B, p21<sub>μ</sub>-MCMT, p21<sub>μ</sub>-pol λ, p21<sub>μ</sub>-pol β, p21<sub>μ</sub>-pol δ<sub>p66</sub>, p21<sub>μ</sub>-FEN1, p21<sub>μ</sub>-RFC, p21<sub>μ</sub>-RecQ5, p21<sub>μ</sub>-DNALig1, p21<sub>μ</sub>-WRN, p21<sub>μ</sub>-XPG, p21<sub>μ</sub>-Cdt2 p21<sub>μ</sub>-Pogo, p21<sub>μ</sub>-pol η, p21<sub>μ</sub>-pol κ.

#### *Manual Synthesis*

Rink Amide PL resin (0.1 mmol, 322 mg, 0.31 mmol/g, Agilent) was swollen in 1:1 DMF/DCM (15 mL) for 15 min. The Fmoc-protecting group was removed by treatment of the resin with a solution of 20% piperidine and 0.1 M HOBt in DMF (5 mL) for 15 min. The solution was drained and the resin washed with DMF (3 × 5 mL). Amino-acid couplings were achieved by addition of a solution of Fmoc-protected amino-acid (5 equiv), HATU (5 equiv) and DIPEA (10 equiv) in DMF (5 mL), to the resin and stirred intermittently for 1 h. The solution was drained and the resin washed with DMF (5 × 5 mL). The *N*-terminal Fmoc-protecting group was removed by treatment of the resin with a solution of 20% piperidine and 0.1 M HOBt in DMF (5 mL) for 10 min, the solution was drained and the resin washed with DMF (5 × 5 mL). A TNBS test\* was used to verify each coupling (negative/colourless) and deprotection (positive/red) step, with steps repeated as necessary. Successive couplings and Fmoc-deprotections were repeated to achieve the desired sequence. The resin was washed with DCM (3 × 5 mL) and then diethyl ether (3 × 5 mL) and air dried with suction. The peptides were then cleaved from the resin according to the protocol '*Cleavage from solid-support, isolation & purification*' detailed below.

\* *TNBS Test:* A small spatula of swollen resin taken out and 1 drop each of TNBS (100 μL 5% w/v in H<sub>2</sub>O added to 900 μL of DMF) and DIPEA solutions (100 μL in 900 μL of DMF) added and allowed to develop for 1 min. Clear/yellow beads indicated no free amine (negative), while red/orange beads showed free amine was present (positive).

*Peptides synthesised by this method:* p21<sub>μ</sub>-pol ι, p21<sub>μ</sub>-PARG, p21<sub>μ</sub>-RD1, p21<sub>μ</sub>-RD2, p21<sub>μ</sub>-RD3.

#### *Cleavage from solid-support, isolation & purification*

Following complete assembly of the peptide and deprotection of the final Fmoc group, the peptides were subsequently cleaved from the resin and the side-chain protecting groups simultaneously globally deprotected by treatment of the resin with 92.5/2.5/2.5/2.5 TFA:TIPS:DODT:H<sub>2</sub>O (5 mL) for 2 hours. The cleavage mixture was pipetted from the resin and concentrated under a stream of nitrogen to 0.5-1 mL. The peptide was then precipitated by addition of diethyl ether (10 mL) and the mixture cooled to -20°C. The precipitate was pelleted by centrifugation (7600 rpm, 10 min), and the supernatant decanted. The pellet was dried under a nitrogen stream, and then dissolved in 1:1 ACN/H<sub>2</sub>O, before being syringe filtered (0.2 μm) and lyophilised to yield the crude peptide as a fluffy white powder. The peptides were purified by semi-preparative RP-HPLC on a Gilson GX-Prep system using a Phenomenex Luna C18(2) column (10 × 250 mm), over a linear ACN/H<sub>2</sub>O gradient optimised for each peptide sample. RP-HPLC solvents were (A) H<sub>2</sub>O with 0.1% TFA and (B) ACN with 0.1% TFA. The product containing fractions were pooled and lyophilised. The identity of the final compounds was confirmed by High Resolution Mass Spectrometry on an Agilent 6230 ESI-TOF LCMS. Purity of the peptides was confirmed by analytical RP-HPLC on an Agilent 1260 HPLC equipped with a Phenomenex Luna C18(2) column (250 × 4.6 mm) over a gradient of 5-50% B (15 min) and visualised at 220 nm. Characterisation data for all peptides is recorded in Table S1.

**Table S1:** Peptide characterisation data. All peptides are C-terminally amidated.

| Name                                   | Sequence                              | Mw      | MF                                                                               | M+ Calc   | [M+4] <sup>++</sup> Calc | ESI+<br>[M+4] <sup>+</sup><br>Found | Purity<br>% (220<br>nm) |
|----------------------------------------|---------------------------------------|---------|----------------------------------------------------------------------------------|-----------|--------------------------|-------------------------------------|-------------------------|
| p21 <sub>μ</sub> (141-155)             | <sup>141</sup> KRRQTSMTDFYHSKR        | 1940.20 | C <sub>82</sub> H <sub>134</sub> N <sub>30</sub> O <sub>23</sub> S <sub>1</sub>  | 1938.9959 | 485.7570                 | 485.7566                            | 96.3                    |
| p21 (139-160)                          | <sup>139</sup> GRKRRQTSMTDFYHSKRRLIFS | 2770.20 | C <sub>120</sub> H <sub>197</sub> N <sub>43</sub> O <sub>31</sub> S <sub>1</sub> | 2769.4722 | 693.3760                 | 693.3793                            | 97.4                    |
| p21 <sub>μ</sub> -Q144D                | KRRDTSMTDFYHSKR                       | 1927.16 | C <sub>81</sub> H <sub>131</sub> N <sub>29</sub> O <sub>24</sub> S <sub>1</sub>  | 1925.9642 | 482.4991                 | 482.5010                            | 98.8                    |
| p21 <sub>μ</sub> -Q144M                | KRRMTSMTDFYHSKR                       | 1943.27 | C <sub>82</sub> H <sub>135</sub> N <sub>29</sub> O <sub>22</sub> S <sub>2</sub>  | 1941.9778 | 486.5024                 | 486.5020                            | 98.9                    |
| p21 <sub>μ</sub> -Q144S                | KRRSTSMTDFYHSKR                       | 1899.15 | C <sub>80</sub> H <sub>131</sub> N <sub>29</sub> O <sub>23</sub> S <sub>1</sub>  | 1897.9693 | 475.5003                 | 475.4999                            | 97.3                    |
| p21 <sub>μ</sub> -Q144K                | KRRKTSMTDFYHSKR                       | 1940.24 | C <sub>83</sub> H <sub>138</sub> N <sub>30</sub> O <sub>22</sub> S <sub>1</sub>  | 1939.0323 | 485.7661                 | 485.7658                            | 93.4                    |
| p21 <sub>μ</sub> -Q144N                | KRRNTSMTDFYHSKR                       | 1926.18 | C <sub>81</sub> H <sub>132</sub> N <sub>30</sub> O <sub>23</sub> S <sub>1</sub>  | 1924.9802 | 482.2531                 | 482.2527                            | 90.7                    |
| p21 <sub>μ</sub> -T145K                | KRRQKSMTDFYHSKR                       | 1967.27 | C <sub>84</sub> H <sub>139</sub> N <sub>31</sub> O <sub>22</sub> S <sub>1</sub>  | 1966.0432 | 492.5188                 | 492.5206                            | 90.2                    |
| p21 <sub>μ</sub> -T145R                | KRRQRSMTDFYHSKR                       | 1995.28 | C <sub>84</sub> H <sub>139</sub> N <sub>33</sub> O <sub>22</sub> S <sub>1</sub>  | 1994.0493 | 499.5203                 | 499.5215                            | 91.0                    |
| p21 <sub>μ</sub> -S146K                | KRRQTKMTDFYHSKR                       | 1981.30 | C <sub>85</sub> H <sub>141</sub> N <sub>31</sub> O <sub>22</sub> S <sub>1</sub>  | 1980.0588 | 496.0227                 | 496.0235                            | 87.0                    |
| p21 <sub>μ</sub> -S146R                | KRRQTRMTDFYHSKR                       | 2009.31 | C <sub>85</sub> H <sub>141</sub> N <sub>33</sub> O <sub>22</sub> S <sub>1</sub>  | 2008.0650 | 503.0243                 | 503.0250                            | 94.0                    |
| p21 <sub>μ</sub> -TS145/146KK          | KRRQKKMTDFYHSKR                       | 2008.37 | C <sub>87</sub> H <sub>146</sub> N <sub>32</sub> O <sub>21</sub> S <sub>1</sub>  | 2007.1061 | 3+: 670.0492             | 670.3799                            | 91.3                    |
| p21 <sub>μ</sub> -TS145/146RK          | KRRQKRMDFYHSKR                        | 2036.38 | C <sub>87</sub> H <sub>146</sub> N <sub>34</sub> O <sub>21</sub> S <sub>1</sub>  | 2035.1122 | 509.7861                 | 509.7864                            | 93.0                    |
| p21 <sub>μ</sub> -TS145/146KR          | KRRQKRMDFYHSKR                        | 2036.38 | C <sub>87</sub> H <sub>146</sub> N <sub>34</sub> O <sub>21</sub> S <sub>1</sub>  | 2035.1122 | 509.7861                 | 509.7859                            | 91.9                    |
| p21 <sub>μ</sub> -TS145/146RR          | KRRQRRMTDFYHSKR                       | 2064.39 | C <sub>87</sub> H <sub>146</sub> N <sub>36</sub> O <sub>21</sub> S <sub>1</sub>  | 2063.1184 | 516.7876                 | 516.7877                            | 90.9                    |
| p21 <sub>μ</sub> -M147I                | KRRQTSITDFYHSK                        | 1765.98 | C <sub>77</sub> H <sub>124</sub> N <sub>26</sub> O <sub>22</sub>                 | 1764.9383 | 442.2426                 | 442.2419                            | 99.1                    |
| p21 <sub>μ</sub> -M147L                | KRRQTSITDFYHSKR                       | 1922.16 | C <sub>83</sub> H <sub>136</sub> N <sub>30</sub> O <sub>23</sub>                 | 1921.0395 | 481.2679                 | 481.2672                            | 99.8                    |
| p21 <sub>μ</sub> -M147A                | KRRQTSATDFYHSKR                       | 1880.08 | C <sub>80</sub> H <sub>130</sub> N <sub>30</sub> O <sub>23</sub>                 | 1878.9925 | 470.7561                 | 470.7556                            | 99.2                    |
| p21 <sub>μ</sub> -M147W                | KRRQTSWTFYHSKR                        | 1995.22 | C <sub>88</sub> H <sub>135</sub> N <sub>31</sub> O <sub>23</sub>                 | 1994.0347 | 499.5167                 | 499.5161                            | 99.5                    |
| p21 <sub>μ</sub> -M147V                | KRRQTSVTFYHSKR                        | 1908.14 | C <sub>82</sub> H <sub>134</sub> N <sub>30</sub> O <sub>23</sub>                 | 1907.0238 | 477.7640                 | 477.7632                            | 98.5                    |
| p21 <sub>μ</sub> -T148D                | KRRQTSMTDFYHSKR                       | 1954.19 | C <sub>82</sub> H <sub>132</sub> N <sub>30</sub> O <sub>24</sub> S <sub>1</sub>  | 1952.9751 | 489.2518                 | 489.2514                            | 91.5                    |
| p21 <sub>μ</sub> -T148E                | KRRQTSMTDFYHSKR                       | 1968.21 | C <sub>83</sub> H <sub>134</sub> N <sub>30</sub> O <sub>24</sub> S <sub>1</sub>  | 1966.9908 | 492.7557                 | 492.7562                            | 90.4                    |
| p21 <sub>μ</sub> -D149E                | KRRQTSMTDFYHSKR                       | 1954.23 | C <sub>83</sub> H <sub>136</sub> N <sub>30</sub> O <sub>23</sub> S <sub>1</sub>  | 1953.0115 | 489.2609                 | 489.2620                            | 88.5                    |
| p21 <sub>μ</sub> -TD148/149EE          | KRRQTSMTDFYHSKR                       | 1982.24 | C <sub>84</sub> H <sub>136</sub> N <sub>30</sub> O <sub>24</sub> S <sub>1</sub>  | 1981.0065 | 496.2596                 | 496.2595                            | 89.4                    |
| p21 <sub>μ</sub> -TS148/149DE          | KRRQTSMTDFYHSKR                       | 1968.21 | C <sub>83</sub> H <sub>134</sub> N <sub>30</sub> O <sub>24</sub> S <sub>1</sub>  | 1966.9908 | 492.7557                 | 492.7555                            | 90.1                    |
| p21 <sub>μ</sub> -F150H                | KRRQTSMTDFYHSKR                       | 1930.16 | C <sub>79</sub> H <sub>132</sub> N <sub>32</sub> O <sub>23</sub> S <sub>1</sub>  | 1928.9864 | 483.2546                 | 483.2542                            | 94.4                    |
| p21 <sub>μ</sub> -F150Y                | KRRQTSMTDFYHSKR                       | 1956.20 | C <sub>82</sub> H <sub>134</sub> N <sub>30</sub> O <sub>24</sub> S <sub>1</sub>  | 1954.9908 | 489.7557                 | 489.7552                            | 93.8                    |
| p21 <sub>μ</sub> -Y151F                | KRRQTSMTDFYHSKR                       | 1924.20 | C <sub>82</sub> H <sub>134</sub> N <sub>30</sub> O <sub>22</sub> S <sub>1</sub>  | 1923.0010 | 481.7582                 | 481.7576                            | 94.2                    |
| p21 <sub>μ</sub> -FY150/151YF          | KRRQTSMTDFYHSKR                       | 1940.20 | C <sub>82</sub> H <sub>134</sub> N <sub>30</sub> O <sub>23</sub> S <sub>1</sub>  | 1938.9959 | 485.7570                 | 485.7589                            | 98.1                    |
| p21 <sub>μ</sub> -DNALig1              | KRRQRSIMSFFHFSKR                      | 1963.32 | C <sub>85</sub> H <sub>143</sub> N <sub>33</sub> O <sub>19</sub> S <sub>1</sub>  | 1962.0959 | 491.5320                 | 491.5311                            | 98.2                    |
| p21 <sub>μ</sub> -FEN1                 | KRRQGRLLDFFHFSKR                      | 1945.20 | C <sub>84</sub> H <sub>137</sub> N <sub>33</sub> O <sub>21</sub>                 | 1944.0667 | 487.0247                 | 487.0241                            | 99.2                    |
| p21 <sub>μ</sub> -Pogo                 | KRRQKKITDYFFHFSKR                     | 1990.32 | C <sub>88</sub> H <sub>148</sub> N <sub>32</sub> O <sub>21</sub>                 | 1989.1497 | 498.2954                 | 498.2965                            | 98.0                    |
| p21 <sub>μ</sub> -XPG                  | KRRQLRIDSFFHFSKR                      | 1973.29 | C <sub>87</sub> H <sub>145</sub> N <sub>33</sub> O <sub>20</sub>                 | 1972.1344 | 494.0416                 | 494.0409                            | 99.1                    |
| p21 <sub>μ</sub> -MCMT                 | KRRQTITSHFFHFSKR                      | 1882.14 | C <sub>80</sub> H <sub>136</sub> N <sub>32</sub> O <sub>21</sub>                 | 1881.0558 | 471.2719                 | 471.2714                            | 93.9                    |
| p21 <sub>μ</sub> -p15                  | KRRQKGIGEFFHFSKR                      | 1873.18 | C <sub>83</sub> H <sub>137</sub> N <sub>31</sub> O <sub>19</sub>                 | 1872.0707 | 469.0257                 | 469.0265                            | 96.5                    |
| p21 <sub>μ</sub> -Cdt1                 | KRRQRRVTDFFHFSKR                      | 2016.33 | C <sub>87</sub> H <sub>146</sub> N <sub>36</sub> O <sub>20</sub>                 | 2015.1514 | 504.7959                 | 504.7954                            | 94.8                    |
| p21 <sub>μ</sub> -pol δ <sub>p66</sub> | KRRQVSITGFFHFSKR                      | 1846.15 | C <sub>82</sub> H <sub>136</sub> N <sub>30</sub> O <sub>19</sub>                 | 1845.0598 | 462.2729                 | 462.2727                            | 99.2                    |
| p21 <sub>μ</sub> -RecQ5                | KRRQNLIRHFFHFSKR                      | 2022.37 | C <sub>90</sub> H <sub>148</sub> N <sub>36</sub> O <sub>18</sub>                 | 2021.1772 | 506.3024                 | 506.3019                            | 99.2                    |
| p21 <sub>μ</sub> -WRN                  | KRRQWKLRFHFSKR                        | 2053.42 | C <sub>92</sub> H <sub>153</sub> N <sub>35</sub> O <sub>19</sub>                 | 2052.2082 | 514.0600                 | 514.0593                            | 99.3                    |
| p21 <sub>μ</sub> -PARG                 | KRRDSKITDHFHFSKR                      | 1910.16 | C <sub>81</sub> H <sub>136</sub> N <sub>32</sub> O <sub>22</sub>                 | 1909.0507 | 478.2707                 | 478.2705                            | 98.4                    |
| p21 <sub>μ</sub> -pol β                | KRRQLQKVHFFHFSKR                      | 1847.18 | C <sub>81</sub> H <sub>139</sub> N <sub>33</sub> O <sub>17</sub>                 | 1846.1027 | 462.5337                 | 462.5330                            | 96.5                    |
| p21 <sub>μ</sub> -pol λ                | KRRSVPVLELFFHFSKR                     | 1851.21 | C <sub>83</sub> H <sub>143</sub> N <sub>29</sub> O <sub>19</sub>                 | 1850.1115 | 463.5359                 | 463.5353                            | 92.4                    |
| p21 <sub>μ</sub> -pol ι                | KRRKGLIDYLLHFSKR                      | 1932.29 | C <sub>87</sub> H <sub>146</sub> N <sub>30</sub> O <sub>20</sub>                 | 1931.1330 | 483.7913                 | 483.7919                            | 87.6                    |
| p21 <sub>μ</sub> -pol κ                | KRRKHTLDIFFHFSKR                      | 1968.32 | C <sub>89</sub> H <sub>146</sub> N <sub>32</sub> O <sub>19</sub>                 | 1967.1442 | 492.7941                 | 492.7939                            | 93.5                    |
| p21 <sub>μ</sub> -RFC <sub>p14</sub>   | KRRMDIRKFFHFSKR                       | 1904.30 | C <sub>84</sub> H <sub>142</sub> N <sub>32</sub> O <sub>17</sub> S <sub>1</sub>  | 1903.0951 | 476.7818                 | 476.7813                            | 93.4                    |
| p21 <sub>μ</sub> -RNaseH2B             | KRRMKSIDTFFHFSKR                      | 1936.29 | C <sub>85</sub> H <sub>142</sub> N <sub>30</sub> O <sub>20</sub> S <sub>1</sub>  | 1935.0737 | 484.7764                 | 484.7761                            | 97.7                    |
| p21 <sub>μ</sub> -Cdt2                 | KRRMRKICTYFFHFSKR                     | 2009.46 | C <sub>87</sub> H <sub>149</sub> N <sub>33</sub> O <sub>18</sub> S <sub>2</sub>  | 2008.1198 | 503.0380                 | 503.0390                            | 93.8                    |
| p21 <sub>μ</sub> -pol n                | KRRMQTLESFFHFSKR                      | 1950.28 | C <sub>85</sub> H <sub>140</sub> N <sub>30</sub> O <sub>21</sub> S <sub>1</sub>  | 1949.0530 | 488.2713                 | 488.2719                            | 96.6                    |
| p21 <sub>μ</sub> -RD1                  | KRRQKRMEDYHFSKR                       | 2080.39 | C <sub>88</sub> H <sub>146</sub> N <sub>34</sub> O <sub>23</sub> S <sub>1</sub>  | 2079.1021 | 520.7835                 | 520.7836                            | 91.0                    |
| p21 <sub>μ</sub> -RD2                  | KRRQTRITEYHFSKR                       | 2005.30 | C <sub>87</sub> H <sub>145</sub> N <sub>33</sub> O <sub>22</sub>                 | 2004.1242 | 502.0389                 | 502.0396                            | 97.1                    |
| p21 <sub>μ</sub> -RD3                  | KRRQKRITEYHFSKR                       | 2048.39 | C <sub>89</sub> H <sub>150</sub> N <sub>34</sub> O <sub>22</sub>                 | 2047.1664 | 512.7994                 | 512.8001                            | 92.3                    |



**SPR:**

**Table S2: Peptide SPR data against hPCNA.** Top Conc is the highest concentration of 8x 1 in 2 dilutions used to calculate the steady state affinity.  $K_D$  is the affinity constant. SE, standard fitting error; On/Off, indicate times for contact and dissociation phases of each run. All peptides are C-terminally amidated.

| Name                                   | Sequence                              | $\epsilon_{205}^*$ | Top Conc (nM) | Affinity $K_D$ (nM) | $K_D$ SE (nM) | $\chi^2$ | On/Off (s) |
|----------------------------------------|---------------------------------------|--------------------|---------------|---------------------|---------------|----------|------------|
| p21 <sub>μ</sub> (141-155)             | <sup>141</sup> KRRQTSMTDFYHSKR        | 67860              | 500           | 12.3                | 0.598         | 0.196    | 30/60      |
| p21 (139-160)                          | <sup>139</sup> GRKRRQTSMTDFYHSKRRLIFS | 98620              | 50            | 4.319               | 1.31          | 10.9     | 60/90      |
| p21 <sub>μ</sub> -Q144D                | KRRDTSMTDFYHSKR                       | 67460              | 2000          | 714                 | 30.4          | 0.126    | 40/60      |
| p21 <sub>μ</sub> -Q144M                | KRRMTSMTDFYHSKR                       | 69290              | 5000          | 1544                | 159           | 1.57     | 40/60      |
| p21 <sub>μ</sub> -Q144S                | KRRSTSMTDFYHSKR                       | 67460              | 5000          | 1032                | 116           | 2.07     | 40/60      |
| p21 <sub>μ</sub> -Q144K                | KRRKTSMTDFYHSKR                       | 67460              | 5000          | 1123                | 148           | 4.19     | 40/60      |
| p21 <sub>μ</sub> -Q144N                | KRRNTSMTDFYHSKR                       | 67860              | 5000          | 772                 | 117           | 3.07     | 40/60      |
| p21 <sub>μ</sub> -T145K                | KRRQKSMTDFYHSKR                       | 67860              | 2000          | 98.05               | 10.8          | 2.58     | 40/60      |
| p21 <sub>μ</sub> -T145R                | KRRQRSMTDFYHSKR                       | 69210              | 1000          | 88.51               | 13.2          | 2.97     | 40/60      |
| p21 <sub>μ</sub> -S146K                | KRRQTKMTDFYHSKR                       | 67860              | 300           | 12.97               | 1.55          | 0.520    | 60/90      |
| p21 <sub>μ</sub> -S146R                | KRRQTRMTDFYHSKR                       | 69210              | 100           | 4.297               | 1.35          | 6.26     | 60/90      |
| p21 <sub>μ</sub> -TS145/146KK          | KRRQKKMTDFYHSKR                       | 67860              | 300           | 20.18               | 4.80          | 6.70     | 60/90      |
| p21 <sub>μ</sub> -TS145/146RK          | KRRQRKMTDFYHSKR                       | 69210              | 300           | 17.30               | 4.66          | 7.94     | 60/90      |
| p21 <sub>μ</sub> -TS145/146KR          | KRRQKRMTDFYHSKR                       | 69210              | 300           | 37.00               | 11.0          | 9.63     | 60/90      |
| p21 <sub>μ</sub> -TS145/146RR          | KRRQRRMTDFYHSKR                       | 70560              | 30            | 1.833               | 0.453         | 5.80     | 60/90      |
| p21 <sub>μ</sub> -M147I                | KRRQTSITDFYHSK                        | 66030              | 200           | 11.1                | 0.258         | 0.0251   | 40/60      |
| p21 <sub>μ</sub> -M147L                | KRRQTSITDFYHSKR                       | 66030              | 200           | 20.49               | 1.75          | 0.784    | 40/60      |
| p21 <sub>μ</sub> -M147A                | KRRQTSATDFYHSKR                       | 66030              | 20000         | 7591                | 626           | 1.43     | 40/60      |
| p21 <sub>μ</sub> -M147W                | KRRQTSWTFYHSKR                        | 86430              | 5000          | 3566                | 165           | 0.274    | 40/60      |
| p21 <sub>μ</sub> -M147V                | KRRQTSVTFYHSKR                        | 66030              | 500           | 29.29               | 1.83          | 0.326    | 40/60      |
| p21 <sub>μ</sub> -T148D                | KRRQTSMDDFYHSKR                       | 67860              | 2000          | 96.47               | 7.32          | 0.477    | 40/60      |
| p21 <sub>μ</sub> -T148E                | KRRQTSMEDFYHSKR                       | 67860              | 200           | 77.40               | 2.62          | 0.0533   | 60/90      |
| p21 <sub>μ</sub> -D149E                | KRRQTSMEFYHSKR                        | 67860              | 500           | 12.67               | 1.4           | 0.387    | 60/90      |
| p21 <sub>μ</sub> -TD148/149EE          | KRRQTSMEEFYHSKR                       | 67860              | 1000          | 48.52               | 1.16          | 0.0475   | 60/90      |
| p21 <sub>μ</sub> -TD148/149DE          | KRRQTSMEDEFYHSKR                      | 67860              | 2000          | 345.8               | 2.67          | 0.273    | 60/90      |
| p21 <sub>μ</sub> -F150H                | KRRQTSMDHYHSKR                        | 64460              | 1000          | 159.0               | 62.8          | 0.119    | 40/60      |
| p21 <sub>μ</sub> -F150Y                | KRRQTSMDYHSKR                         | 65340              | 300           | 20.2                | 0.424         | 0.0286   | 40/60      |
| p21 <sub>μ</sub> -Y151F                | KRRQTSMTDFHHSKR                       | 70380              | 300           | 10.61               | 1.48          | 0.721    | 60/90      |
| p21 <sub>μ</sub> -FY150/151YF          | KRRQTSMTDYFHSKR                       | 67860              | 30            | 2.175               | 0.531         | 3.01     | 60/90      |
| p21 <sub>μ</sub> -DNALig1              | KRRQRSIMSFHHSKR                       | 71730              | 250           | 40.74               | 9.20          | 3.42     | 60/90      |
| p21 <sub>μ</sub> -FEN1                 | KRRQGRLDDFFHHSKR                      | 69900              | 2000          | 165.6               | 2.07          | 1.67     | 40/60      |
| p21 <sub>μ</sub> -Pogo                 | KRRQKKITDYFHSKR                       | 66030              | 100           | 8.816               | 3.30          | 6.73     | 60/90      |
| p21 <sub>μ</sub> -XPG                  | KRRQLRIDSFHHSKR                       | 69900              | 200           | 16.39               | 4.81          | 11.2     | 60/90      |
| p21 <sub>μ</sub> -MCMT                 | KRRQTITSHFHSKR                        | 65150              | 2000          | 106.0               | 24.4          | 5.32     | 40/60      |
| p21 <sub>μ</sub> -p15                  | KRRQKGIGEFFHHSKR                      | 68550              | 2000          | 234.0               | 42.4          | 5.21     | 40/60      |
| p21 <sub>μ</sub> -Cdt1                 | KRRQRRVTDFFHHSKR                      | 71250              | 150           | 8.760               | 2.22          | 10.1     | 40/60      |
| p21 <sub>μ</sub> -pol δ <sub>p66</sub> | KRRQVSITGFFHHSKR                      | 68550              | 1000          | 123.7               | 4.24          | 3.21     | 40/60      |
| p21 <sub>μ</sub> -RecQ5                | KRRQNLIRHFFHHSKR                      | 75500              | 20000         | >40000**            |               |          |            |
| p21 <sub>μ</sub> -WRN                  | KRRQWKLLRDFHHSKR                      | 81700              | 2000          | 1155                | 67.3          | 0.952    | 40/60      |
| p21 <sub>μ</sub> -PARG                 | KRRDSKITDHFHHSKR                      | 64750              | 2000          | 90.03               | 18.4          | 2.38     | 40/60      |
| p21 <sub>μ</sub> -pol β                | KRRQLQKVHFHHSKR                       | 62770              | 20000         | 5732                | 822           | 18.6     | 40/60      |
| p21 <sub>μ</sub> -pol λ                | KRRSVPVLELFHHSKR                      | 59550              | 20000         | 8144                | 766           | 4.81     | 40/60      |
| p21 <sub>μ</sub> -pol ι                | KRRKGLIDYLFHHSKR                      | 63110              | 1500          | 111.2               | 5.41          | 0.0710   | 60/90      |
| p21 <sub>μ</sub> -pol κ                | KRRKHTLIDFFHHSKR                      | 73350              | 10000         | 3296                | 353           | 6.62     | 40/60      |
| p21 <sub>μ</sub> -RFC <sub>p14</sub>   | KRRMDIRKFFHHSKR                       | 68550              | 1000          | 145.2               | 34.5          | 6.42     | 40/60      |
| p21 <sub>μ</sub> -Cdt2                 | KRRMRKICTYFHSKR                       | 69500              |               | NS***               |               |          |            |
| p21 <sub>μ</sub> -pol η                | KRRMQTLESFFHHSKR                      | 70380              | 10000         | 2537                | 745           | 10.2     | 40/60      |
| p21 <sub>μ</sub> -RNAseH2B             | KRRMKSIDTFHHSKR                       | 69980              | 2000          | 640.4               | 51.1          | 0.851    | 40/60      |
| p21 <sub>μ</sub> -RD1                  | KRRQRKMEDYYHSKR                       | 66690              | 100           | 8.152               | 1.27          | 1.51     | 40/60      |
| p21 <sub>μ</sub> -RD2                  | KRRQRTRITEYFHSKR                      | 67380              | 50            | 1.118               | 0.330         | 2.40     | 60/90      |
| p21 <sub>μ</sub> -RD3                  | KRRQRTRITEYYHSKR                      | 64860              | 200           | 6.70                | 1.58          | 3.96     | 40/60      |

\* Determined using online calculator, from Anthis 2013 (1)

\*\* Peptide bound very non-specifically to protein where the RU significantly exceeded the expected maximum and a  $K_D$  could not be determined.

\*\*\* Peptide bound significantly to the reference cell of sensor chip such that a  $K_D$  could not be determined

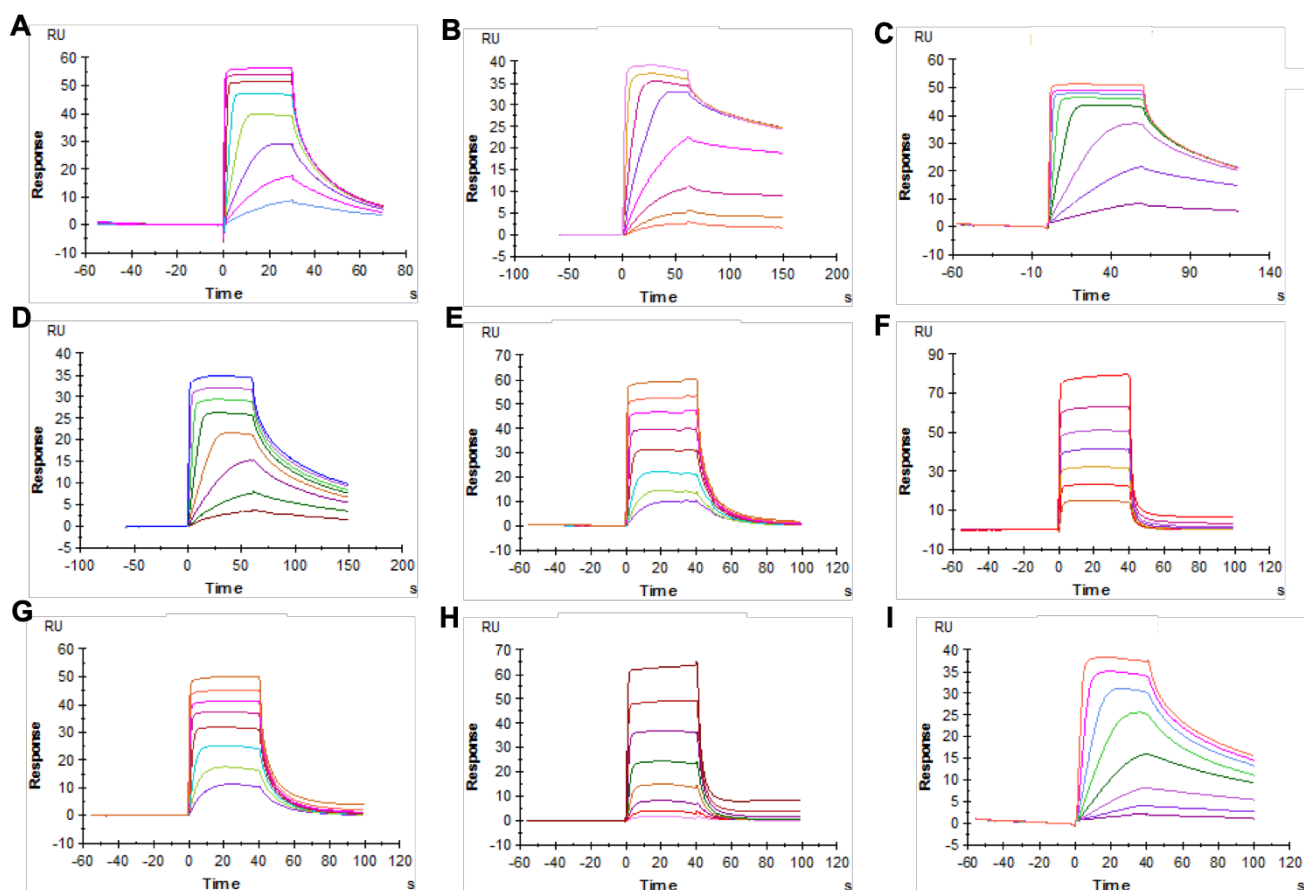

**Figure S1:** Representative sample of SPR sensorgrams. **A** p21 $\mu$  **B** p21 $\mu$ -S146R **C** p21 $\mu$ -FY150/151YF **D** p21 $\mu$ -Y151F **E** p21 $\mu$ -FEN1 **F** p21 $\mu$ -pol  $\eta$  **G** p21 $\mu$ -PARG **H** p21 $\mu$ -RNaseH2B **I** p21 $\mu$ -RD1

## COCRYSTAL EXPERIMENTS

**Table S3:** Data collection and refinement statistics of hPCNA bound with p21 $\mu$  (RCSB PDB ID: 7KQ1), and hPCNA bound with p21 $\mu$ -F150Y (RCSB PDB ID: 7KQ0). Statistics for the highest-resolution shell are shown in parentheses.

| PDB ID                         | 7KQ1                            | 7KQ0                            |
|--------------------------------|---------------------------------|---------------------------------|
| Wavelength                     | 0.9537                          | 0.9537                          |
| Resolution range               | 41.09 - 3.3 (3.418 - 3.3)       | 41.15 - 2.4 (2.486 - 2.4)       |
| Space group                    | P 32 2 1                        | P 3                             |
| Unit cell                      | 136.66 136.66 104.005 90 90 120 | 142.563 142.563 41.03 90 90 120 |
| Unique reflections             | 17208 (1689)                    | 32881 (3598)                    |
| Multiplicity                   | 19.9 (18.2)                     | 10.7 (11.1)                     |
| Completeness (%)               | 99.83 (99.64)                   | 90.13 (99.94)                   |
| Mean I/sigma(I)                | 10.45 (0.91)                    | 40.58 (13.50)                   |
| <sup>a</sup> R-merge           | 0.2823 (4.453)                  | 0.04334 (0.1841)                |
| <sup>b</sup> Rpim              | 0.065 (0.755)                   | 0.014 (0.570)                   |
| CC1/2                          | 0.999 (0.469)                   | 1 (0.987)                       |
| Reflections used in refinement | 17192 (1684)                    | 32881 (3598)                    |
| Reflections used for R-free    | 1716 (171)                      | 2031 (224)                      |
| <sup>c</sup> R-work            | 0.2419 (0.3591)                 | 0.1537 (0.2023)                 |
| <sup>d</sup> R-free            | 0.2685 (0.3618)                 | 0.2011 (0.2813)                 |
| Number of non-hydrogen atoms   | 6084                            | 6086                            |
| macromolecules                 | 6084                            | 5976                            |
| Protein residues               | 816                             | 807                             |
| RMS(bonds)                     | 0.003                           | 0.004                           |
| RMS(angles)                    | 0.69                            | 0.68                            |
| Ramachandran favoured (%)      | 94.78                           | 98.10                           |
| Ramachandran allowed (%)       | 4.73                            | 1.64                            |
| Ramachandran outliers (%)      | 0.50                            | 0.25                            |
| Rotamer outliers (%)           | 0.00                            | 8.80                            |
| Clashscore                     | 8.80                            | 3.15                            |
| Average B-factor               | 108.50                          | 32.34                           |

$$^a R_{\text{merge}} = \sum |I - \langle I \rangle| / \sum I.$$

$$^b R_{\text{pim}} = \sum h [1 / (I_h - 1)]^{1/2} \sum | \langle I_h \rangle - I_{h,i} | / \sum_h \sum_i I_{h,i} \quad (2)$$

$$^c R_{\text{work}} = \sum |F_o - F_c| / \sum |F_o| \text{ for all data excluding data used to calculate } R_{\text{free}}.$$

$$^d R_{\text{free}} = \sum |F_o - F_c| / \sum |F_o|, \text{ for all data.}$$

**Table S4:** Secondary Interaction Summary for co-crystal structure of p21<sub>μ</sub> with hPCNA (PDB ID: 7KQ1) calculated using the RING server. Only peptide chain interactions reported (chains B, D and F). Interactions reported are an average of the number of interactions observed for the three chains. RING session ID: [5ef50f2b0e9f94078ea226bd](#)

|                                       | Residue      | Intermolecular |        | Intramolecular |        | Total |
|---------------------------------------|--------------|----------------|--------|----------------|--------|-------|
|                                       |              | VDW            | H-Bond | VDW            | H-Bond |       |
| FI                                    | 141          | 0              | 0      | 0              | 0      |       |
|                                       | 142          | 0.67           | 0      | 0              | 0      |       |
|                                       | 143          | 0              | 0.67   | 0              | 0      |       |
| PIP-box                               | * 144        | 1.67           | 0      | 0              | 0      |       |
|                                       | 145          | 2.33           | 1.00   | 0.67           | 0.33   |       |
|                                       | 146          | 0.67           | 0.33   | 0.33           | 1.00   |       |
|                                       | * 147        | 6.67           | 1.00   | 0.33           | 1.67   |       |
|                                       | 148          | 0.33           | 0      | 0              | 0      |       |
|                                       | 149          | 0              | 0      | 0              | 0      |       |
|                                       | * 150        | 2.67           | 0.00   | 0              | 0      |       |
|                                       | * 151        | 2.00           | 0.67   | 0              | 0      |       |
|                                       | 152          | 1.00           | 1.00   | 0              | 0      |       |
| FI                                    | 153          | 1.67           | 0.33   | 0              | 0      |       |
|                                       | 154          | 0.67           | 1.00   | 0              | 0      |       |
|                                       | 155          | 0              | 0      | 0              | 0      |       |
|                                       | <b>Total</b> | 20.3           | 6.0    | 1.3            | 3.0    | 30.67 |
| <b>PIP-box</b>                        |              | 16             | 3      | 1              | 3      | 23.67 |
| <b>Flanking (FI)</b>                  |              | 4              | 3      | 0              | 0      | 7     |
| <b>Conserved (*) PIP-box residues</b> |              | 11.00          | 1      | 0              | 2      | 14.00 |
| <b>Non-conserved PIP-box residues</b> |              | 3.33           | 1.33   | 1.00           | 1.33   | 7.00  |

**Other:** Intermolecular pi-stack between F-Tyr151 to E-Tyr133, and D-Tyr151 to C-Tyr250

**Table S5:** Secondary Interaction Summary for co-crystal structure of p21<sub>μ</sub>-F150Y with hPCNA (PDB ID: 7KQ0) calculated using the RING server. Only peptide chain interactions reported (chains B, D and F). Interactions reported are an average of the number of interactions observed for the three chains. RING session ID: [5f595dab0e9f94078ea22f07](#)

|                                       | Residue      | Intermolecular |        | Intramolecular |        | Total |
|---------------------------------------|--------------|----------------|--------|----------------|--------|-------|
|                                       |              | VDW            | H-Bond | VDW            | H-Bond |       |
| FI                                    | 141          | 0              | 0      | 0              | 0      |       |
|                                       | 142          | 1              | 0      | 0              | 0      |       |
|                                       | 143          | 0              | 1      | 0              | 0      |       |
| PIP-box                               | * 144        | 1              | 0      | 0              | 0      |       |
|                                       | 145          | 1              | 1      | 0              | 1      |       |
|                                       | 146          | 1              | 0      | 1              | 0      |       |
|                                       | * 147        | 3              | 1      | 2              | 1      |       |
|                                       | 148          | 1              | 0      | 0              | 0      |       |
|                                       | 149          | 0              | 0      | 0              | 0      |       |
|                                       | * 150        | 2              | 0      | 0              | 0      |       |
|                                       | * 151        | 2              | 0      | 0              | 0      |       |
|                                       | 152          | 0              | 1      | 0              | 0      |       |
| FI                                    | 153          | 0              | 0      | 0              | 0      |       |
|                                       | 154          | 0              | 0      | 0              | 0      |       |
|                                       | 155          | 1              | 0      | 0              | 0      |       |
|                                       | <b>Total</b> | 13.0           | 4.0    | 2.67           | 2.67   | 22.33 |
| <b>PIP-box</b>                        |              | 11             | 2      | 3              | 3      | 18.33 |
| <b>Flanking (FI)</b>                  |              | 2              | 2      | 0              | 0      | 4     |
| <b>Conserved (*) PIP-box residues</b> |              | 6.67           | 1      | 2              | 1      | 10.67 |
| <b>Non-conserved PIP-box residues</b> |              | 2.00           | 0.67   | 1.00           | 1.33   | 5.00  |

**Other:**

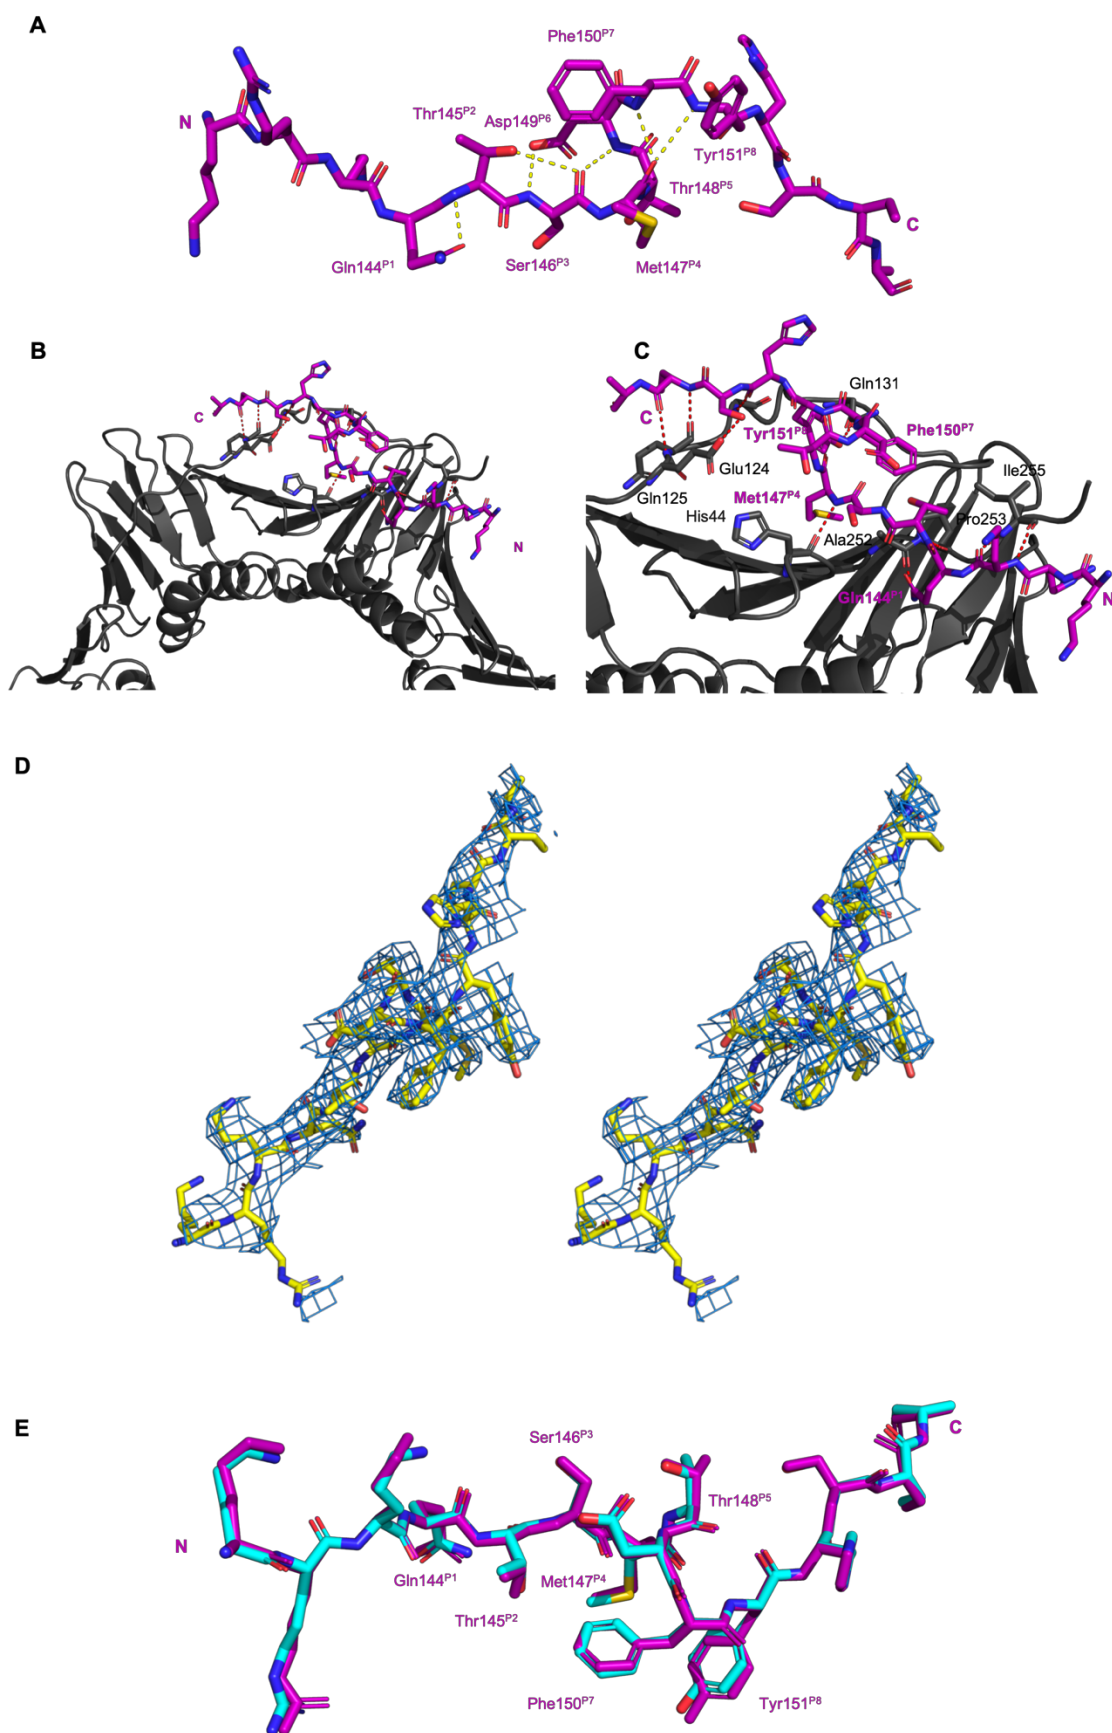

**Figure S2:** Co-crystal structure of p21<sub>μ</sub> (purple, sticks) bound to PCNA monomer (grey, cartoon). Heteroatoms indicated as blue, nitrogen; red, oxygen; yellow, sulfur. **A** Intramolecular interactions shown as yellow dashes, and PIP-box residues labelled in purple. **B & C** Intermolecular interactions shown as red dashes, PCNA residues labelled in grey/white and conserved PIP-box residues labelled in purple. **D** Representative electron density of p21<sub>μ</sub> (yellow, sticks) shown as a wall-eye stereo image 2Fo-Fc composite omit map, view contoured at 1.5σ. **E** Overlay of p21<sub>μ</sub> (purple, sticks) bound to PCNA (not shown) co-crystal structure, with p21<sub>μ</sub> (cyan, sticks) that has been energy minimised on the PCNA surface which shows a high degree of structural similarity, and validates the computational modelling approach.

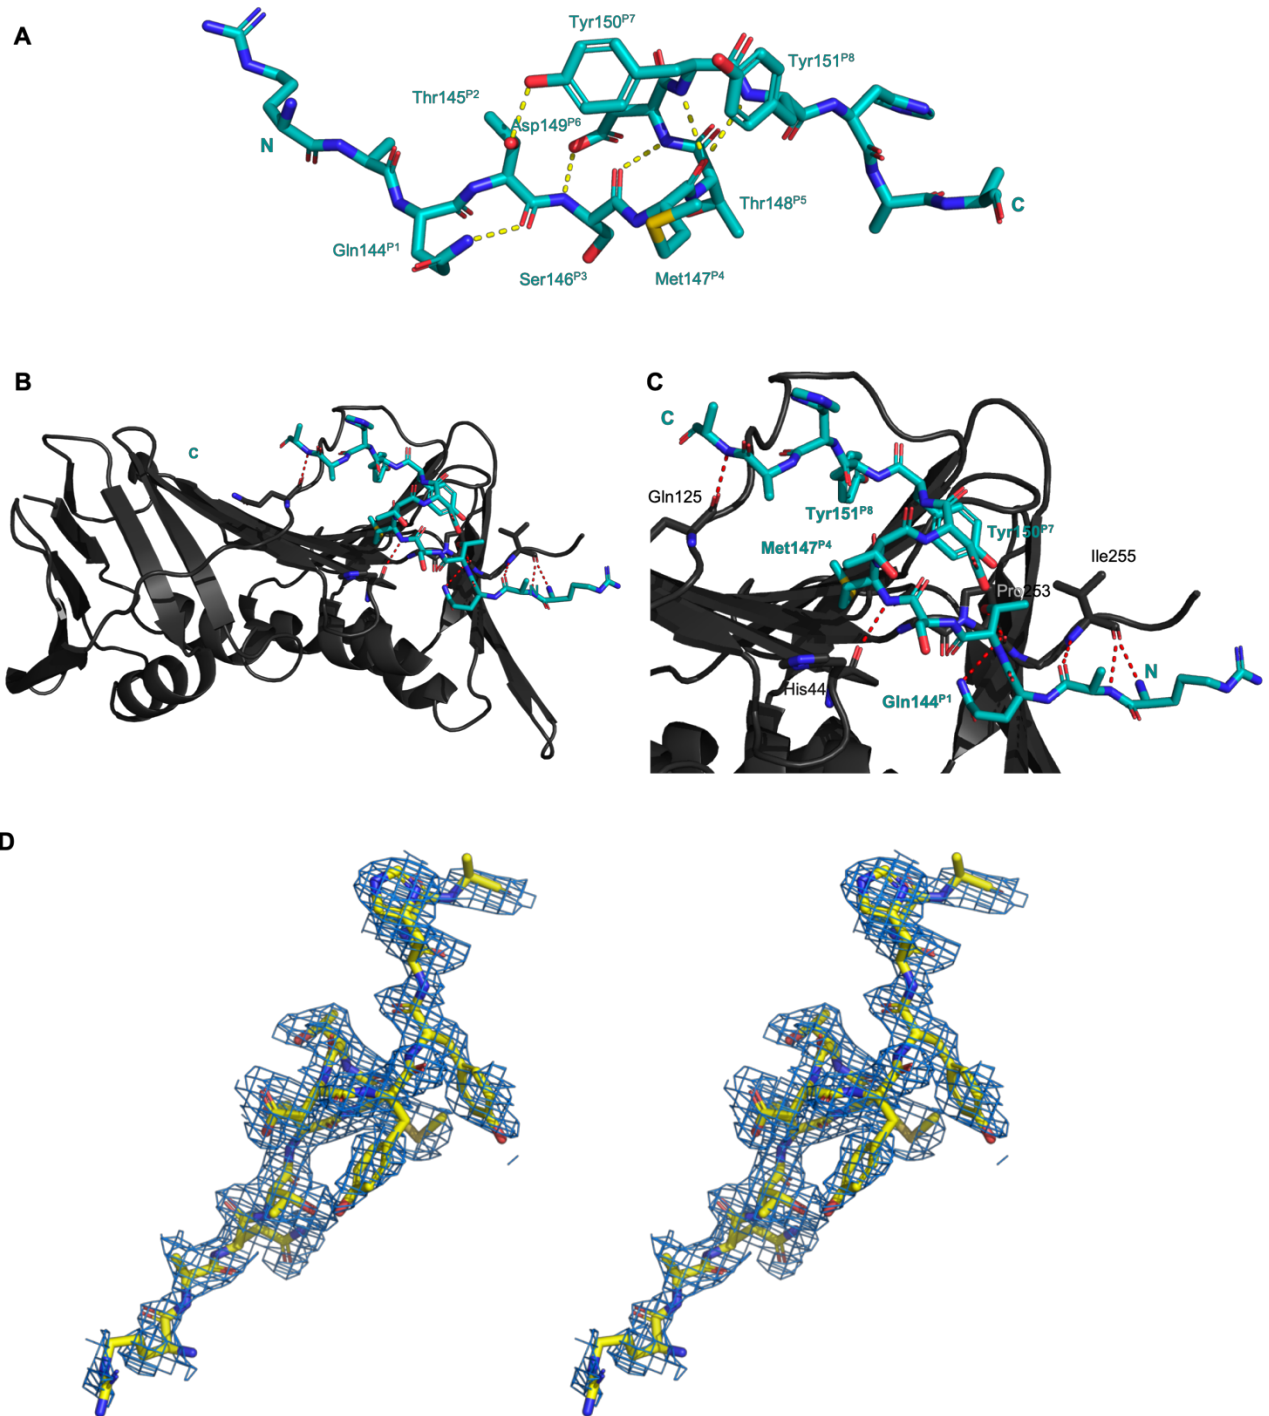

**Figure S3:** Co-crystal structure of p21<sub>μ</sub>-F150Y (blue, sticks) bound to PCNA monomer (grey, cartoon). Heteroatoms indicated as blue, nitrogen; red, oxygen; yellow, sulfur **A** Intramolecular interactions shown as yellow dashes, and PIP-box residues labelled in blue. **B & C** Intermolecular interactions shown as red dashes, PCNA residues labelled in grey/white and conserved PIP-box residues labelled in blue. **D** Representative electron density of p21<sub>μ</sub>-F150Y (yellow, sticks) shown as a wall-eye stereo image 2Fo-Fc composite omit map, view contoured at 1.5σ.

## COMPUTATIONAL MODELLING OF PCNA MONOMERS BOUND TO P21 $\mu$ PEPTIDES

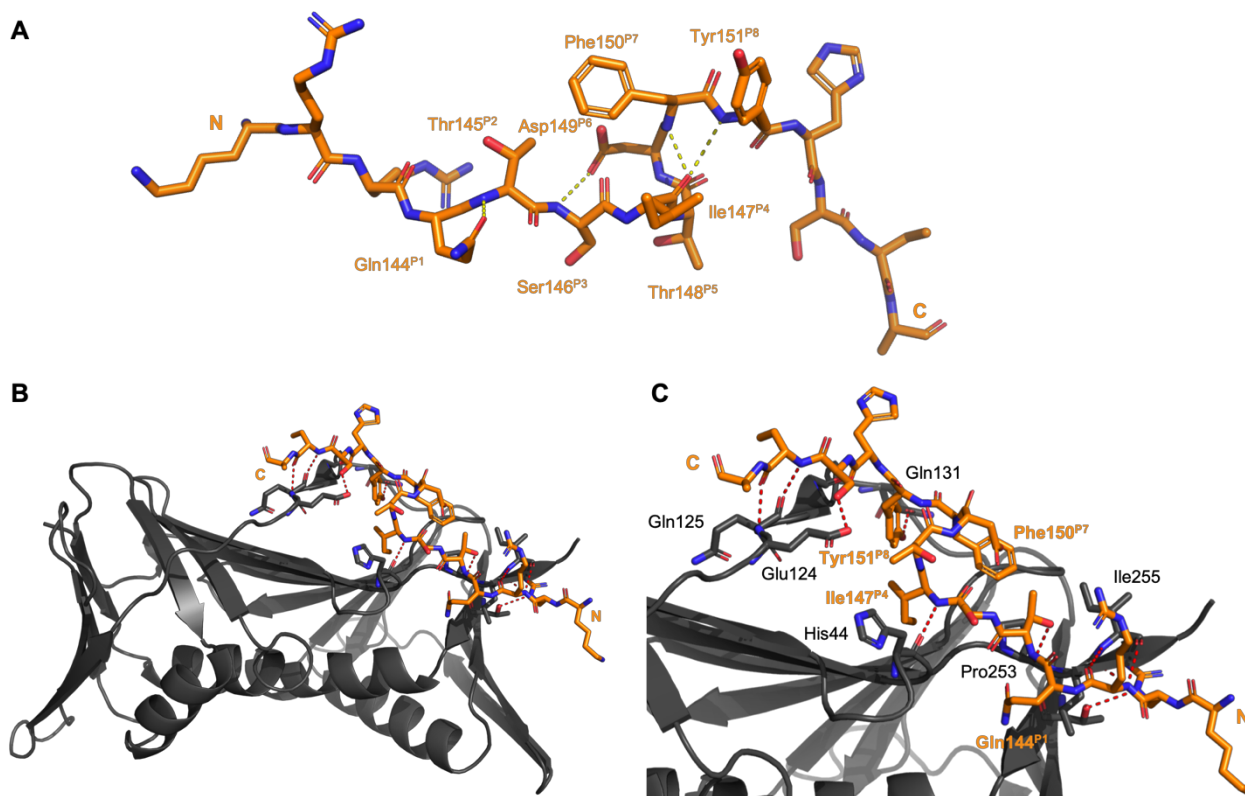

**Figure S4:** Computationally modelled structure of p21 $\mu$ -M147I (orange, sticks) on the PIP-box binding site of a hPCNA monomer (grey, cartoon). Heteroatoms indicated as blue, nitrogen; red, oxygen; yellow, sulfur. **A** Intramolecular interactions shown as yellow dashes, and PIP-box residues labelled in orange. **B & C** Intermolecular interactions shown as red dashes, PCNA residues labelled in grey/white and conserved PIP-box residues labelled in orange.

**Table S6:** Secondary Interaction Summary for computationally modelled structure of p21 $\mu$ -M147I with hPCNA calculated using the RING server. Chain B interactions only. RING Session ID: [5f3b21280e9f94078ea22cfe](https://ring-server.org/session/5f3b21280e9f94078ea22cfe)

|                                       | Residue | Intermolecular |        | Intramolecular |        | Total |
|---------------------------------------|---------|----------------|--------|----------------|--------|-------|
|                                       |         | VDW            | H-Bond | VDW            | H-Bond |       |
| FI                                    | 141     | 0              | 0      | 0              | 0      |       |
|                                       | 142     | 3              | 1      | 0              | 0      |       |
|                                       | 143     | 1              | 2      | 0              | 0      |       |
| PIP-box                               | * 144   | 1              | 0      | 0              | 0      |       |
|                                       | 145     | 1              | 1      | 2              | 0      |       |
|                                       | 146     | 1              | 0      | 0              | 0      |       |
|                                       | * 147   | 2              | 1      | 0              | 1      |       |
|                                       | 148     | 2              | 0      | 0              | 0      |       |
|                                       | 149     | 0              | 0      | 0              | 0      |       |
|                                       | * 150   | 3              | 0      | 0              | 0      |       |
|                                       | * 151   | 3              | 2      | 0              | 0      |       |
| FI                                    | 152     | 0              | 1      | 0              | 0      |       |
|                                       | 153     | 1              | 0      | 0              | 0      |       |
|                                       | 154     | 1              | 1      | 0              | 0      |       |
|                                       | 155     | 0              | 0      | 0              | 0      |       |
| <b>Total</b>                          |         | 19             | 9      | 2              | 1      | 31    |
| <b>PIP-box</b>                        |         | 13             | 4      | 2              | 1      | 20    |
| <b>Flanking (FI)</b>                  |         | 6              | 5      | 0              | 0      | 11    |
| <b>Conserved (*) PIP-box residues</b> |         | 6              | 1      | 0              | 1      | 8     |
| <b>Non-conserved PIP-box residues</b> |         | 4              | 1      | 2              | 0      | 7     |

**Other:** Intermolecular pi-stack between B-Tyr151 and A-Tyr133



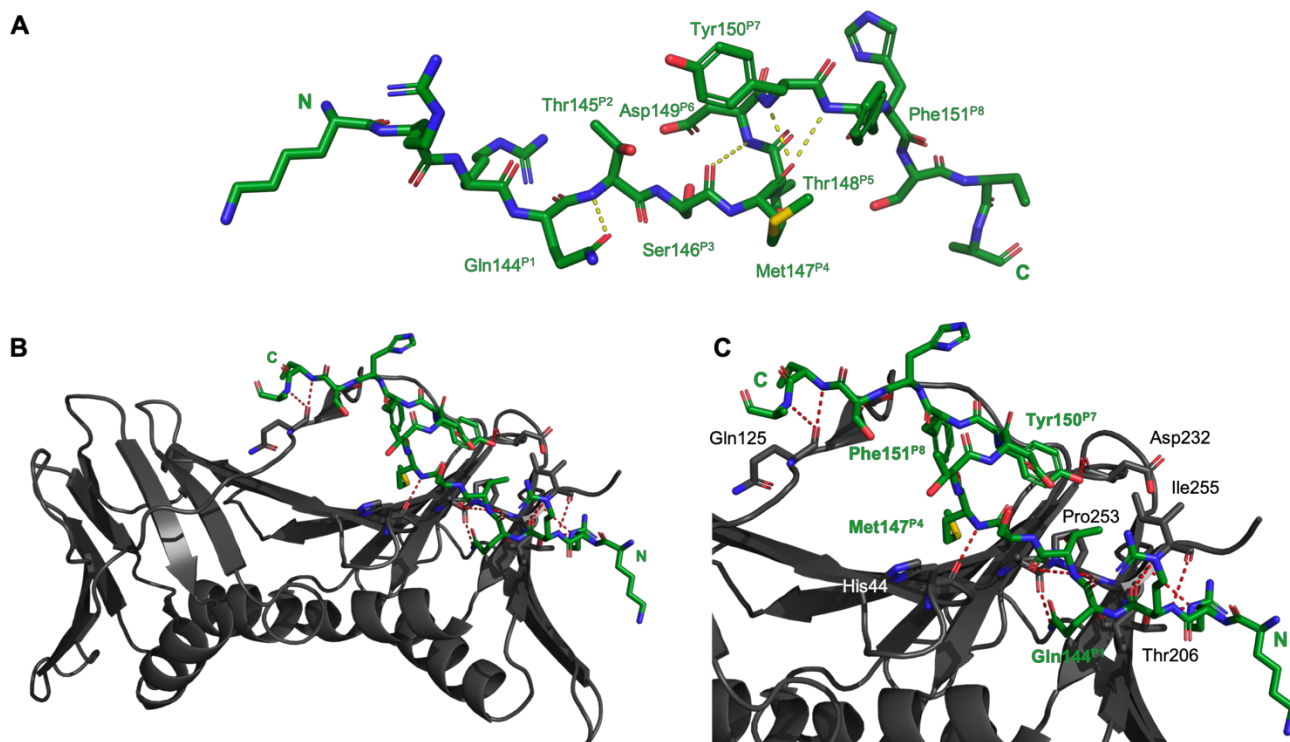

**Figure S5:** Computationally modelled structure of p21<sub>μ</sub>-FY150/151YF (dark green, sticks) on the PIP-box binding site of a hPCNA monomer (grey, cartoon). Heteroatoms indicated as blue, nitrogen; red, oxygen; yellow, sulfur. **A** Intramolecular interactions shown as yellow dashes, and PIP-box residues labelled in dark green **B & C** Intermolecular interactions shown as red dashes, PCNA residues labelled in grey/white and conserved PIP-box residues labelled in dark green.

**Table S7:** Secondary Interaction Summary for computationally modelled structure of p21<sub>μ</sub>-FY150/151YF with hPCNA calculated using the RING server. Chain B interactions only. RING session ID: [5f3b22bc0e9f94078ea22d03](https://ring.rutgers.edu/session/5f3b22bc0e9f94078ea22d03)

|         | Residue                               | Intermolecular |        | Intramolecular |        | Total |
|---------|---------------------------------------|----------------|--------|----------------|--------|-------|
|         |                                       | VDW            | H-Bond | VDW            | H-Bond |       |
| FI      | 141                                   | 0              | 0      | 0              | 0      |       |
|         | 142                                   | 4              | 2      | 0              | 0      |       |
|         | 143                                   | 1              | 1      | 0              | 0      |       |
| PIP-box | * 144                                 | 2              | 0      | 0              | 0      |       |
|         | 145                                   | 1              | 1      | 0              | 0      |       |
|         | 146                                   | 1              | 0      | 0              | 1      |       |
|         | * 147                                 | 6              | 1      | 1              | 2      |       |
|         | 148                                   | 1              | 0      | 0              | 0      |       |
|         | 149                                   | 0              | 0      | 0              | 0      |       |
|         | * 150                                 | 3              | 1      | 0              | 0      |       |
| * 151   | 2                                     | 0              | 0      | 0              |        |       |
| FI      | 152                                   | 0              | 0      | 0              | 0      |       |
|         | 153                                   | 1              | 0      | 0              | 0      |       |
|         | 154                                   | 2              | 1      | 0              | 0      |       |
|         | 155                                   | 0              | 1      | 0              | 0      |       |
|         | <b>Total</b>                          | 24             | 8      | 1              | 3      | 36    |
|         | <b>PIP-box</b>                        | 16             | 3      | 1              | 3      | 23    |
|         | <b>Flanking (FI)</b>                  | 8              | 5      | 0              | 0      | 13    |
|         | <b>Conserved (*) PIP-box residues</b> | 11             | 2      | 1              | 2      | 16    |
|         | <b>Non-conserved PIP-box residues</b> | 3              | 1      | 0              | 1      | 5     |

**Other:** Intermolecular ionic interaction between B-Arg143 and A-Asp257; Intermolecular pi-stack between B-Tyr151 and A-Tyr250

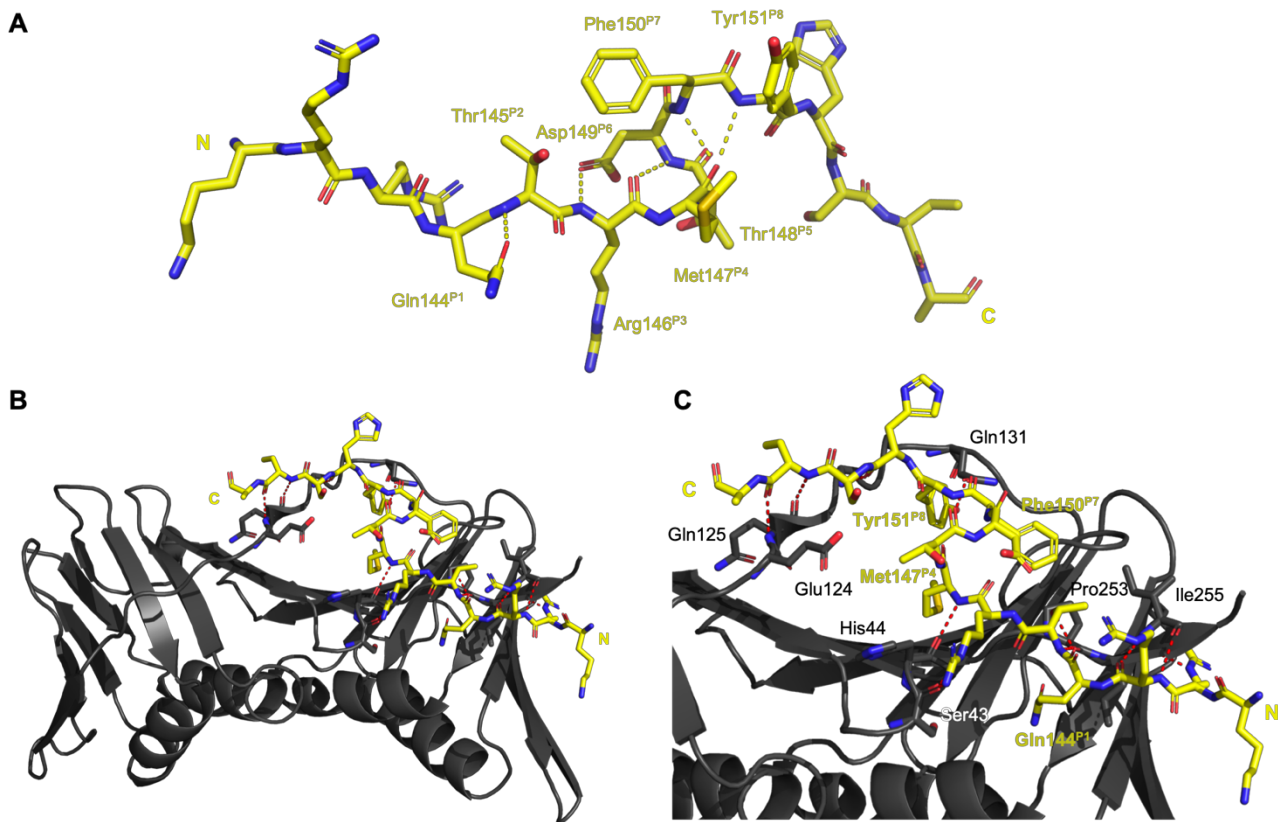

**Figure S6:** Computationally modelled structure of p21<sub>μ</sub>-S146R (yellow, sticks) on the PIP-box binding site of a hPCNA monomer (grey, cartoon). Heteroatoms indicated as blue, nitrogen; red, oxygen; yellow, sulfur. **A** Intramolecular interactions shown as yellow dashes, and PIP-box residues labelled in yellow. **B & C** Intermolecular interactions shown as red dashes, PCNA residues labelled in grey/white and conserved PIP-box residues labelled in yellow.

**Table S8:** Secondary Interaction Summary for computationally modelled structured of p21<sub>μ</sub>-S146R with hPCNA calculated using the RING server. Chain B interactions only. RING Session ID: [5f3b1f6b0e9f94078ea22cf9](https://ring.rdg.ac.uk/session/5f3b1f6b0e9f94078ea22cf9)

|         | Residue                               | Intermolecular |        | Intramolecular |        | Total |
|---------|---------------------------------------|----------------|--------|----------------|--------|-------|
|         |                                       | VDW            | H-Bond | VDW            | H-Bond |       |
| FI      | 141                                   | 0              | 0      | 0              | 0      |       |
|         | 142                                   | 3              | 1      | 0              | 0      |       |
|         | 143                                   | 2              | 2      | 0              | 0      |       |
|         | * 144                                 | 1              | 0      | 0              | 0      |       |
| PIP-box | 145                                   | 1              | 1      | 1              | 0      |       |
|         | 146                                   | 2              | 1      | 0              | 1      |       |
|         | * 147                                 | 4              | 1      | 1              | 2      |       |
|         | 148                                   | 0              | 0      | 0              | 0      |       |
|         | 149                                   | 0              | 0      | 0              | 0      |       |
|         | * 150                                 | 3              | 0      | 0              | 0      |       |
|         | * 151                                 | 2              | 1      | 0              | 0      |       |
|         | 152                                   | 0              | 1      | 0              | 0      |       |
| FI      | 153                                   | 2              | 0      | 0              | 0      |       |
|         | 154                                   | 0              | 1      | 0              | 0      |       |
|         | 155                                   | 0              | 1      | 0              | 0      |       |
|         | <b>Total</b>                          | 20             | 10     | 2              | 3      | 35    |
|         | <b>PIP-box</b>                        | 13             | 4      | 2              | 3      | 22    |
|         | <b>Flanking (FI)</b>                  | 7              | 6      | 0              | 0      | 13    |
|         | <b>Conserved (*) PIP-box residues</b> | 8              | 1      | 1              | 2      | 12    |
|         | <b>Non-conserved PIP-box residues</b> | 3              | 2      | 1              | 1      | 7     |

**Other:** Intermolecular ionic interaction between B-Arg143 and A-Asp257



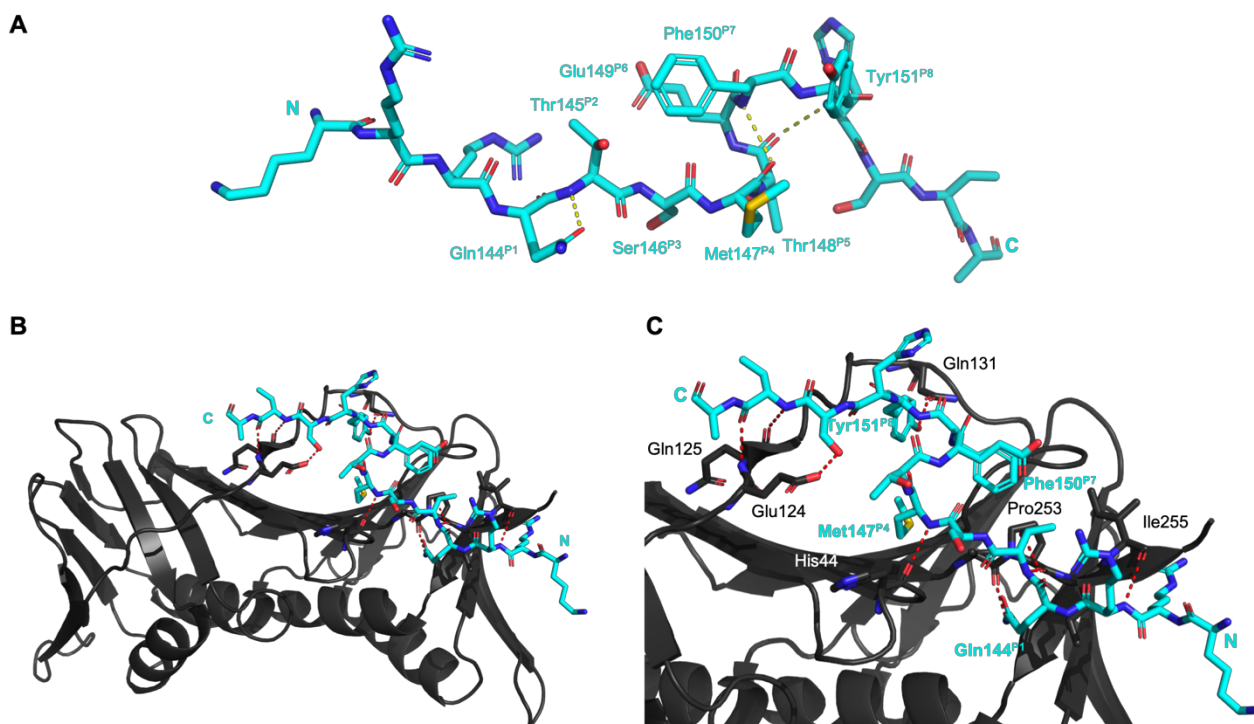

**Figure S7:** Computationally modelled structure of p21<sub>μ</sub>-D149E (light blue, sticks) on the PIP-box binding site of a hPCNA monomer (grey, cartoon). Heteroatoms indicated as blue, nitrogen; red, oxygen; yellow, sulfur. **A** Intramolecular interactions shown as yellow dashes, and PIP-box residues labelled in light blue. **B & C** Intermolecular interactions shown as red dashes, PCNA residues labelled in grey/white and conserved PIP-box residues labelled in light blue.

**Table S9:** Secondary Interaction Summary for computationally modelled structured of p21<sub>μ</sub>-D149E with hPCNA calculated using the RING server. Chain B interactions only. RING Session ID: [5f3b21fe0e9f94078ea22d00](https://ring-server.org/session/5f3b21fe0e9f94078ea22d00)

|         | Residue                               | Intermolecular |        | Intramolecular |        | Total |
|---------|---------------------------------------|----------------|--------|----------------|--------|-------|
|         |                                       | VDW            | H-Bond | VDW            | H-Bond |       |
| FI      | 141                                   | 0              | 0      | 0              | 0      |       |
|         | 142                                   | 2              | 2      | 0              | 0      |       |
|         | 143                                   | 0              | 2      | 0              | 0      |       |
| PIP-box | * 144                                 | 2              | 0      | 0              | 0      |       |
|         | 145                                   | 1              | 1      | 1              | 0      |       |
|         | 146                                   | 1              | 0      | 0              | 1      |       |
|         | * 147                                 | 4              | 1      | 1              | 2      |       |
|         | 148                                   | 1              | 0      | 0              | 0      |       |
|         | 149                                   | 0              | 0      | 1              | 0      |       |
|         | * 150                                 | 3              | 0      | 0              | 0      |       |
|         | * 151                                 | 4              | 2      | 0              | 0      |       |
| FI      | 152                                   | 1              | 0      | 0              | 0      |       |
|         | 153                                   | 1              | 0      | 0              | 0      |       |
|         | 154                                   | 0              | 1      | 0              | 0      |       |
|         | 155                                   | 0              | 0      | 0              | 0      |       |
|         | <b>Total</b>                          | 20             | 9      | 3              | 3      | 35    |
|         | <b>PIP-box</b>                        | 16             | 4      | 3              | 3      | 26    |
|         | <b>Flanking (FI)</b>                  | 4              | 5      | 0              | 0      | 9     |
|         | <b>Conserved (*) PIP-box residues</b> | 9              | 1      | 2              | 2      | 14    |
|         | <b>Non-conserved PIP-box residues</b> | 3              | 1      | 2              | 1      | 7     |

**Other:** Intermolecular ionic interaction between B-Arg143 and A-Asp257; Intermolecular pi-stack between B-Tyr151 and A-Tyr250

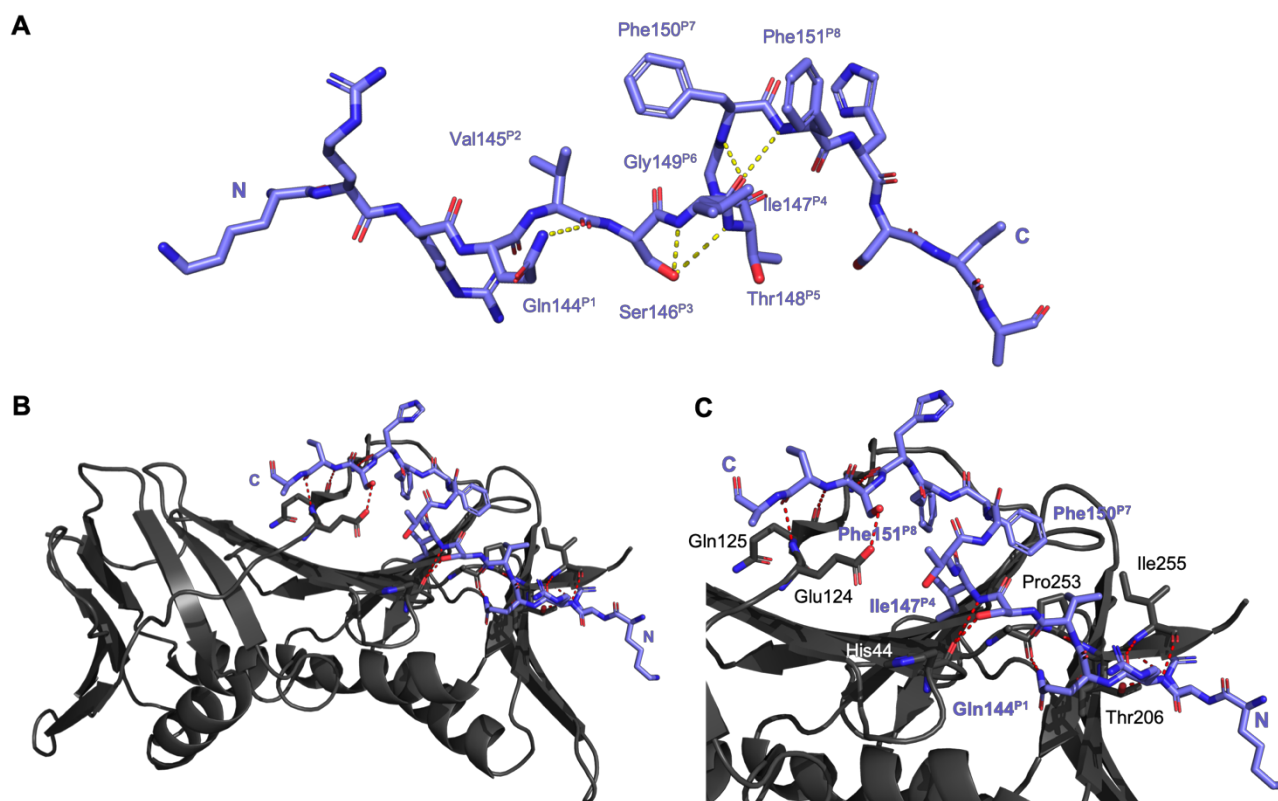

**Figure S8:** Computationally modelled structure of p21<sub>μ</sub>- pol δ<sub>p66</sub> (light purple, sticks) on the PIP-box binding site of a hPCNA monomer (grey, cartoon). Heteroatoms indicated as blue, nitrogen; red, oxygen; yellow, sulfur. **A** Intramolecular interactions shown as yellow dashes, and PIP-box residues labelled in light purple. **B & C** Intermolecular interactions shown as red dashes, PCNA residues labelled in grey/white and conserved PIP-box residues labelled in light purple.

**Table S10:** Secondary Interaction Summary for computationally modelled structured of p21<sub>μ</sub>-pol δ<sub>p66</sub> with hPCNA calculated using the RING server. Chain B interactions only. RING Session ID: [5f3b202a0e9f94078ea22cfb](https://ring-server.org/session/5f3b202a0e9f94078ea22cfb)

| Residue                               | Intermolecular |          | Intramolecular |          | Total     |
|---------------------------------------|----------------|----------|----------------|----------|-----------|
|                                       | VDW            | H-Bond   | VDW            | H-Bond   |           |
| FI                                    | 141            | 0        | 0              | 0        |           |
|                                       | 142            | 3        | 0              | 2        |           |
|                                       | 143            | 1        | 0              | 2        |           |
| PIP-box                               | * 144          | 2        | 0              | 0        |           |
|                                       | 145            | 1        | 0              | 1        |           |
|                                       | 146            | 0        | 0              | 0        |           |
|                                       | * 147          | 5        | 0              | 1        | 2         |
|                                       | 148            | 0        | 0              | 0        | 0         |
|                                       | 149            | 0        | 0              | 0        | 0         |
|                                       | * 150          | 1        | 0              | 0        | 0         |
|                                       | * 151          | 2        | 0              | 0        | 0         |
| FI                                    | 152            | 0        | 0              | 1        |           |
|                                       | 153            | 2        | 0              | 0        |           |
|                                       | 154            | 0        | 0              | 1        |           |
|                                       | 155            | 1        | 0              | 0        |           |
| <b>Total</b>                          | <b>18</b>      | <b>7</b> | <b>2</b>       | <b>2</b> | <b>29</b> |
| <b>PIP-box</b>                        | <b>11</b>      | <b>1</b> | <b>2</b>       | <b>2</b> | <b>16</b> |
| <b>Flanking (FI)</b>                  | <b>7</b>       | <b>6</b> | <b>0</b>       | <b>0</b> | <b>13</b> |
| <b>Conserved (*) PIP-box residues</b> | <b>8</b>       | <b>0</b> | <b>1</b>       | <b>2</b> | <b>11</b> |
| <b>Non-conserved PIP-box residues</b> | <b>1</b>       | <b>1</b> | <b>1</b>       | <b>0</b> | <b>3</b>  |

**Other:** Intermolecular pi-stack between B-Phe151 and A-Tyr250

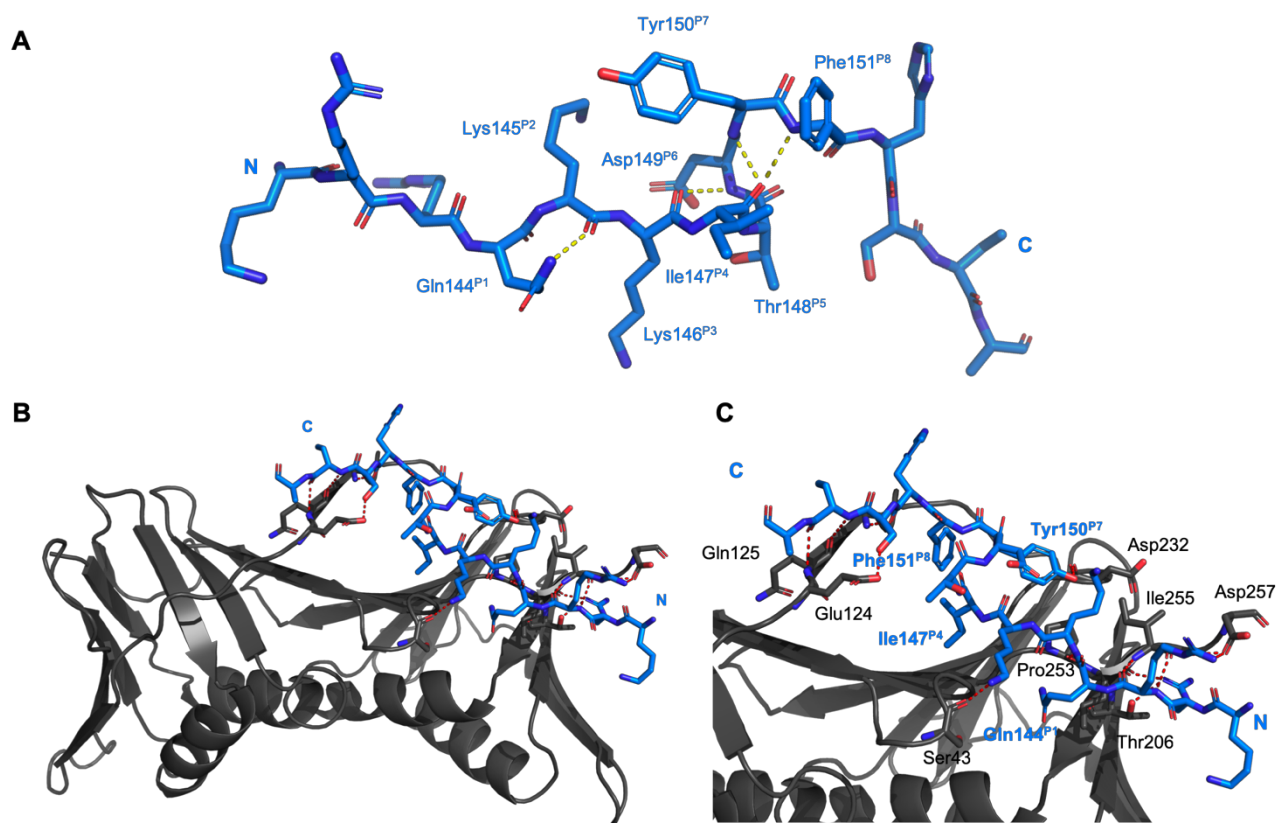

**Figure S9:** Computationally modelled structure of p21<sub>μ</sub>-Pogo (dark blue, sticks) on the PIP-box binding site of a hPCNA monomer (grey, cartoon). Heteroatoms indicated as blue, nitrogen; red, oxygen; yellow, sulfur. **A** Intramolecular interactions shown as yellow dashes, and PIP-box residues labelled in blue. **B & C** Intermolecular interactions shown as red dashes, PCNA residues labelled in grey/white and conserved PIP-box residues labelled in blue.

**Table S11:** Secondary Interaction Summary for computationally modelled structured of p21<sub>μ</sub>-Pogo with hPCNA calculated using the RING server. Chain B interactions only. RING Session ID: [5f3b224d0e9f94078ea22d01](https://ring-server.org/session/5f3b224d0e9f94078ea22d01)

| Residue                                                                                                                             | Intermolecular |        | Intramolecular |        | Total |
|-------------------------------------------------------------------------------------------------------------------------------------|----------------|--------|----------------|--------|-------|
|                                                                                                                                     | VDW            | H-Bond | VDW            | H-Bond |       |
| FI                                                                                                                                  | 141            | 0      | 0              | 0      |       |
|                                                                                                                                     | 142            | 3      | 2              | 0      |       |
|                                                                                                                                     | 143            | 1      | 2              | 0      |       |
| PIP-box                                                                                                                             | * 144          | 2      | 0              | 0      |       |
|                                                                                                                                     | 145            | 2      | 0              | 0      |       |
|                                                                                                                                     | 146            | 1      | 0              | 1      |       |
|                                                                                                                                     | * 147          | 7      | 0              | 1      | 2     |
|                                                                                                                                     | 148            | 1      | 0              | 0      | 0     |
|                                                                                                                                     | 149            | 0      | 0              | 0      | 0     |
|                                                                                                                                     | * 150          | 3      | 1              | 0      | 0     |
|                                                                                                                                     | * 151          | 3      | 0              | 0      | 0     |
|                                                                                                                                     | 152            | 0      | 1              | 0      | 0     |
| FI                                                                                                                                  | 153            | 0      | 0              | 0      |       |
|                                                                                                                                     | 154            | 0      | 1              | 0      |       |
|                                                                                                                                     | 155            | 0      | 0              | 0      |       |
|                                                                                                                                     | <b>Total</b>   | 23     | 7              | 1      | 3     |
| <b>PIP-box</b>                                                                                                                      | 19             | 1      | 1              | 3      | 24    |
| <b>Flanking (FI)</b>                                                                                                                | 4              | 6      | 0              | 0      | 10    |
| <b>Conserved (*) PIP-box residues</b>                                                                                               | 12             | 1      | 1              | 2      | 16    |
| <b>Non-conserved PIP-box residues</b>                                                                                               | 4              | 0      | 0              | 1      | 5     |
| <b>Other:</b> Intermolecular ionic interaction between B-Arg143 and A-Asp257; Intermolecular pi-stack between B-Phe151 and A-Tyr250 |                |        |                |        |       |

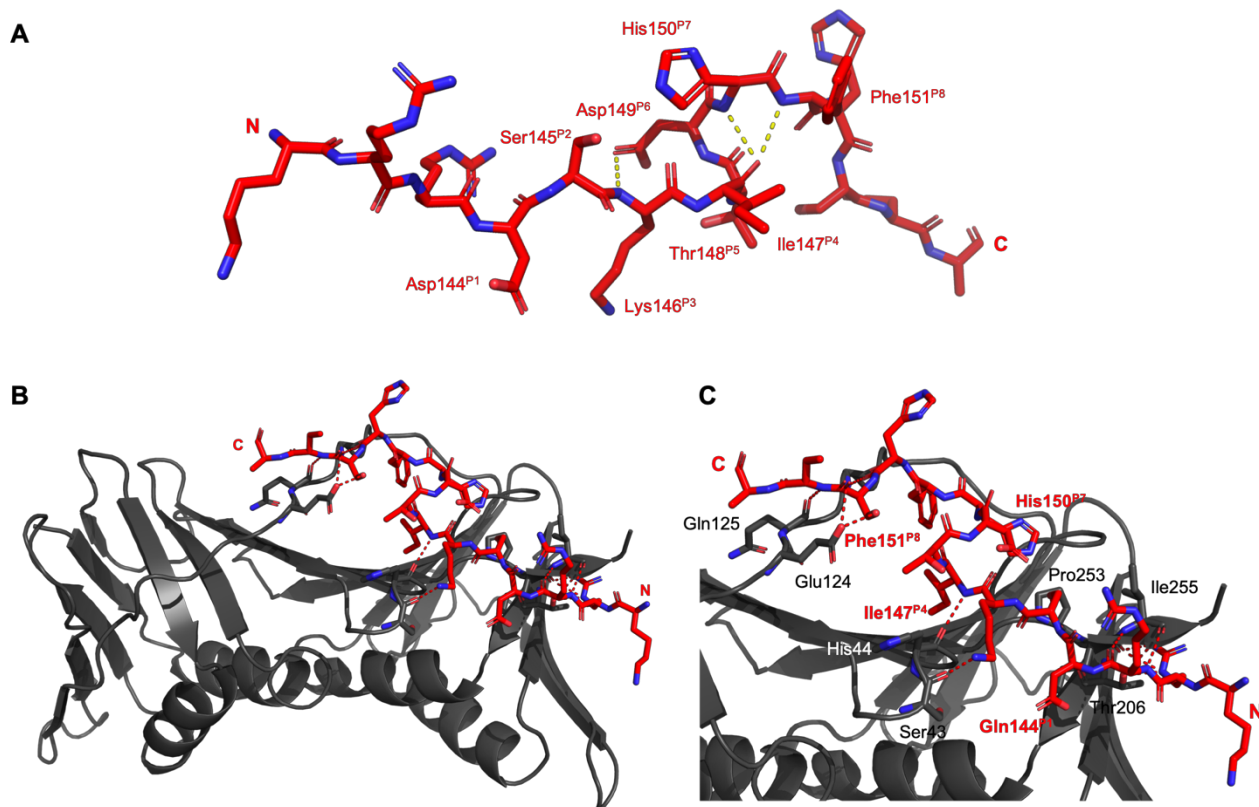

**Figure S10:** Computationally modelled structure of p21<sub>μ</sub>-PARG (red, sticks) on the PIP-box binding site of a hPCNA monomer (grey, cartoon). Heteroatoms indicated as blue, nitrogen; red, oxygen; yellow, sulfur. **A** Intramolecular interactions shown as yellow dashes, and PIP-box residues labelled in red. **B & C** Intermolecular interactions shown as red dashes, PCNA residues labelled in grey/white and conserved PIP-box residues labelled in red.

**Table S12:** Secondary Interaction Summary for computationally modelled structured of p21<sub>μ</sub>-PARG with hPCNA calculated using the RING server. Chain B interactions only. RING Session ID: [5f3b1de50e9f94078ea22cf7](https://ring.rutgers.edu/session/5f3b1de50e9f94078ea22cf7)

|                                                                     | Residue                               | Intermolecular |        | Intramolecular |        | Total |
|---------------------------------------------------------------------|---------------------------------------|----------------|--------|----------------|--------|-------|
|                                                                     |                                       | VDW            | H-Bond | VDW            | H-Bond |       |
| FI                                                                  | 141                                   | 0              | 0      | 0              | 0      |       |
|                                                                     | 142                                   | 2              | 2      | 0              | 0      |       |
|                                                                     | 143                                   | 0              | 2      | 0              | 0      |       |
|                                                                     | * 144                                 | 1              | 0      | 0              | 0      |       |
| PIP-box                                                             | 145                                   | 1              | 0      | 0              | 0      |       |
|                                                                     | 146                                   | 1              | 0      | 0              | 1      |       |
|                                                                     | * 147                                 | 2              | 1      | 0              | 2      |       |
|                                                                     | 148                                   | 0              | 0      | 0              | 0      |       |
|                                                                     | 149                                   | 0              | 0      | 0              | 0      |       |
|                                                                     | * 150                                 | 3              | 0      | 0              | 0      |       |
|                                                                     | * 151                                 | 3              | 0      | 0              | 0      |       |
|                                                                     | 152                                   | 0              | 1      | 0              | 0      |       |
| FI                                                                  | 153                                   | 1              | 0      | 0              | 0      |       |
|                                                                     | 154                                   | 0              | 1      | 0              | 0      |       |
|                                                                     | 155                                   | 0              | 0      | 0              | 0      |       |
|                                                                     | <b>Total</b>                          | 14             | 7      | 0              | 3      | 24    |
|                                                                     | <b>PIP-box</b>                        | 11             | 1      | 0              | 3      | 15    |
|                                                                     | <b>Flanking (FI)</b>                  | 3              | 6      | 0              | 0      | 9     |
|                                                                     | <b>Conserved (*) PIP-box residues</b> | 5              | 1      | 0              | 2      | 8     |
|                                                                     | <b>Non-conserved PIP-box residues</b> | 3              | 0      | 0              | 1      | 4     |
| <b>Other:</b> Intermolecular pi-stack between B-Tyr151 and A-Tyr250 |                                       |                |        |                |        |       |

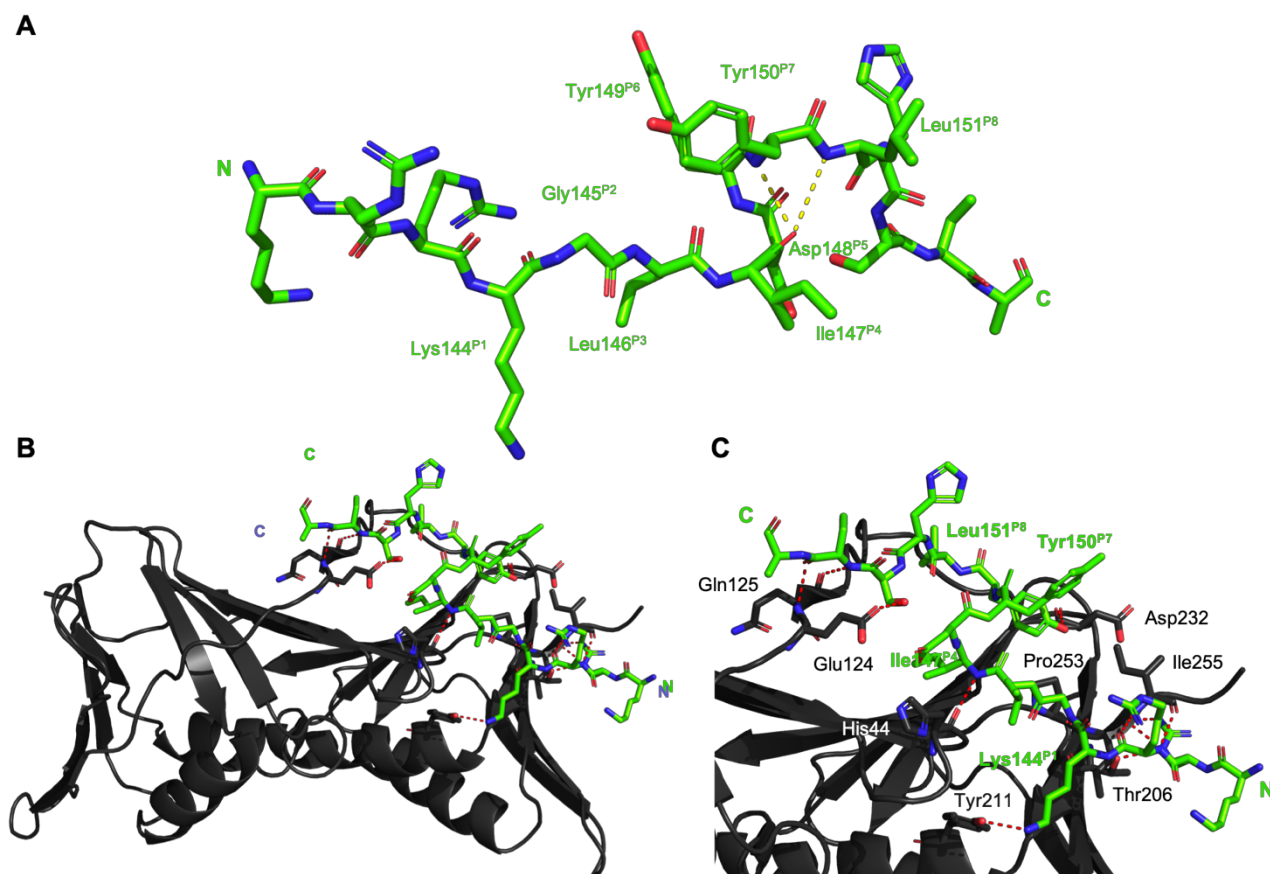

**Figure S11:** Computationally modelled structure of p21<sub>μ</sub>-pol I (green, sticks) on the PIP-box binding site of a hPCNA monomer (grey, cartoon). Heteroatoms indicated as blue, nitrogen; red, oxygen; yellow, sulfur. **A** Intramolecular interactions shown as yellow dashes, and PIP-box residues labelled in green **B & C** Intermolecular interactions shown as red dashes, PCNA residues labelled in grey/white and conserved PIP-box residues labelled in green

**Table S13:** Secondary Interaction Summary for computationally modelled structured of p21<sub>μ</sub>-pol I with hPCNA calculated using the RING server. Chain B interactions only. RING Session ID: [5f3b1e580e9f94078ea22cf8](https://ring.rcsb.org/session/5f3b1e580e9f94078ea22cf8)

| Residue                               | Intermolecular |        | Intramolecular |        | Total |
|---------------------------------------|----------------|--------|----------------|--------|-------|
|                                       | VDW            | H-Bond | VDW            | H-Bond |       |
| FI                                    | 141            | 0      | 0              | 0      |       |
|                                       | 142            | 2      | 2              | 0      |       |
|                                       | 143            | 0      | 2              | 0      |       |
| PIP-box                               | * 144          | 1      | 0              | 0      |       |
|                                       | 145            | 1      | 1              | 0      |       |
|                                       | 146            | 2      | 0              | 1      |       |
|                                       | * 147          | 3      | 1              | 0      |       |
|                                       | 148            | 1      | 0              | 0      |       |
|                                       | 149            | 0      | 0              | 0      |       |
|                                       | * 150          | 2      | 1              | 0      |       |
|                                       | * 151          | 1      | 0              | 0      |       |
| FI                                    | 152            | 0      | 1              | 0      |       |
|                                       | 153            | 2      | 0              | 0      |       |
|                                       | 154            | 0      | 1              | 0      |       |
|                                       | 155            | 0      | 0              | 0      |       |
| <b>Total</b>                          | 15             | 9      | 1              | 1      | 26    |
| <b>PIP-box</b>                        | 11             | 3      | 1              | 1      | 16    |
| <b>Flanking (FI)</b>                  | 4              | 6      | 0              | 0      | 10    |
| <b>Conserved (*) PIP-box residues</b> | 6              | 2      | 0              | 1      | 9     |
| <b>Non-conserved PIP-box residues</b> | 5              | 1      | 1              | 0      | 7     |
| <b>Other:</b>                         |                |        |                |        |       |

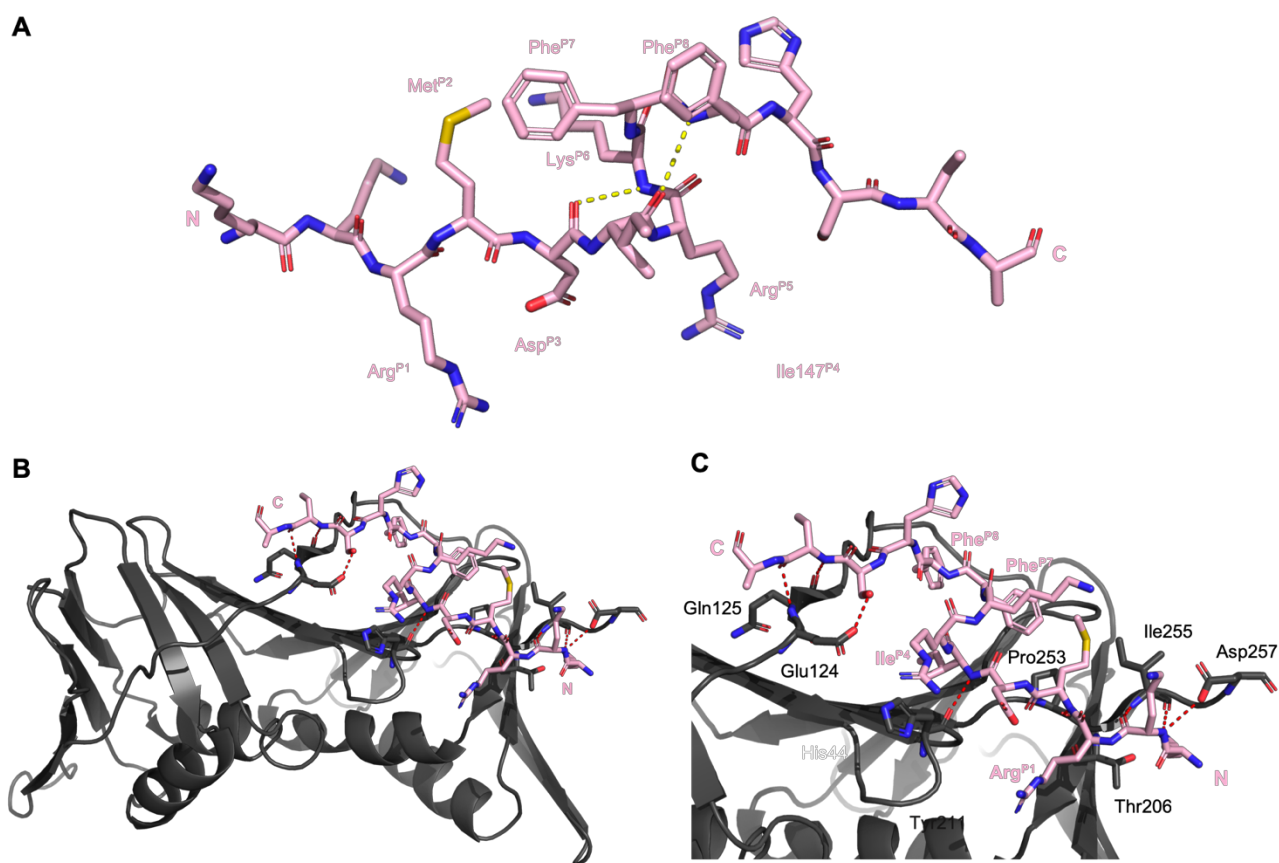

**Figure S12:** Computationally modelled structure of p21<sub>μ</sub>-RFC (light pink, sticks) on the PIP-box binding site of a hPCNA monomer (grey, cartoon). Heteroatoms indicated as blue, nitrogen; red, oxygen; yellow, sulfur. **A** Intramolecular interactions shown as yellow dashes, and PIP-box residues labelled in light pink **B & C** Intermolecular interactions shown as red dashes, PCNA residues labelled in grey/white and conserved PIP-box residues labelled in light pink

**Table S14:** Secondary Interaction Summary for computationally modelled structured of p21<sub>μ</sub>-RFC with hPCNA calculated using the RING server. Chain B interactions only. RING Session ID: [5f3b20890e9f94078ea22cfd](https://ring-server.org/session/5f3b20890e9f94078ea22cfd)

|                                                                                                                                     | Residue                               | Intermolecular |        |   | Intramolecular |        | Total |
|-------------------------------------------------------------------------------------------------------------------------------------|---------------------------------------|----------------|--------|---|----------------|--------|-------|
|                                                                                                                                     |                                       | VDW            | H-Bond |   | VDW            | H-Bond |       |
| FI                                                                                                                                  | 142                                   | 3              | 0      |   | 0              | 0      |       |
|                                                                                                                                     | 143                                   | 1              | 2      |   | 0              | 0      |       |
| PIP-box                                                                                                                             | 144                                   | 1              | 0      |   | 0              | 0      |       |
|                                                                                                                                     | 145                                   | 2              | 1      |   | 1              | 0      |       |
|                                                                                                                                     | 146                                   | 1              | 0      |   | 0              | 2      |       |
|                                                                                                                                     | * 147                                 | 2              | 1      |   | 0              | 2      |       |
|                                                                                                                                     | 148                                   | 1              | 0      |   | 0              | 0      |       |
|                                                                                                                                     | 149                                   | 0              | 0      |   | 0              | 0      |       |
|                                                                                                                                     | * 150                                 | 2              | 0      |   | 0              | 0      |       |
|                                                                                                                                     | * 151                                 | 2              | 0      |   | 0              | 0      |       |
| FI                                                                                                                                  | 152                                   | 0              | 0      |   | 0              | 0      |       |
|                                                                                                                                     | 153                                   | 2              | 0      |   | 0              | 0      |       |
|                                                                                                                                     | 154                                   | 0              | 1      |   | 0              | 0      |       |
|                                                                                                                                     | 155                                   | 0              | 0      |   | 0              | 0      |       |
|                                                                                                                                     | <b>Total</b>                          | 17             | 5      |   | 1              | 4      | 27    |
|                                                                                                                                     | <b>PIP-box</b>                        | 11             | 2      |   | 1              | 4      | 18    |
|                                                                                                                                     | <b>Flanking (FI)</b>                  | 6              | 3      |   | 0              | 0      | 9     |
|                                                                                                                                     | <b>Conserved (*) PIP-box residues</b> | 6              | 1      | 0 | 0              | 2      | 9     |
|                                                                                                                                     | <b>Non-conserved PIP-box residues</b> | 5              | 1      | 0 | 1              | 2      | 9     |
| <b>Other:</b> Intermolecular ionic interaction between B-Arg143 and A-Asp257; Intermolecular pi-stack between B-Tyr151 and A-Tyr250 |                                       |                |        |   |                |        |       |



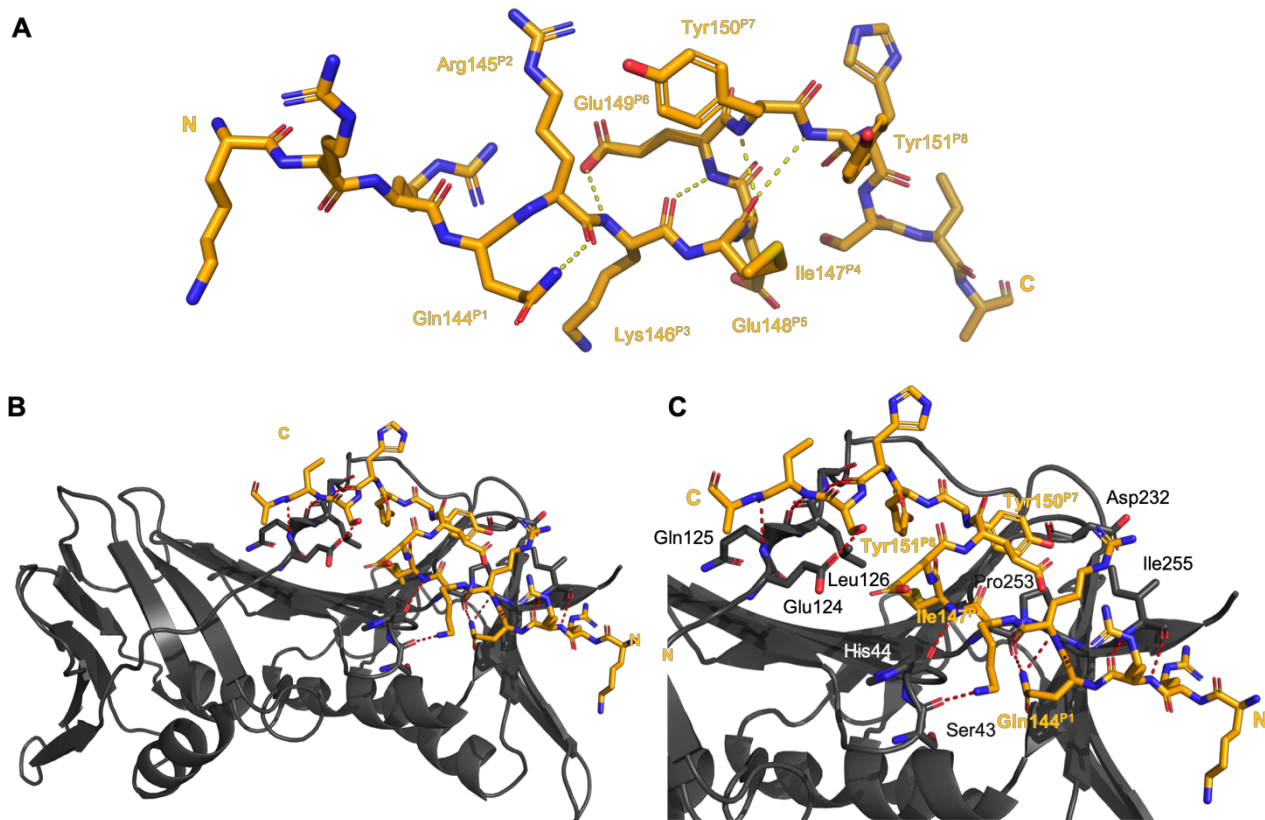

**Figure S13:** Computationally modelled structure of p21<sub>μ</sub>-RD1 (light orange, sticks) on the PIP-box binding site of a hPCNA monomer (grey, cartoon). Heteroatoms indicated as blue, nitrogen; red, oxygen; yellow, sulfur. **A** Intramolecular interactions shown as yellow dashes, and PIP-box residues labelled in light orange. **B & C** Intermolecular interactions shown as red dashes, PCNA residues labelled in grey/white and conserved PIP-box residues labelled in light orange.

**Table S15:** Secondary Interaction Summary for computationally modelled structured of p21<sub>μ</sub>-RD1 with hPCNA calculated using the RING server. Chain B interactions only. RING Session ID: [5f3b21c10e9f94078ea22cff](https://ring-server.org/session/5f3b21c10e9f94078ea22cff)

| Residue                               | Intermolecular |        | Intramolecular |        | Total |
|---------------------------------------|----------------|--------|----------------|--------|-------|
|                                       | VDW            | H-Bond | VDW            | H-Bond |       |
| FI                                    | 141            | 0      | 0              | 0      |       |
|                                       | 142            | 3      | 2              | 0      |       |
|                                       | 143            | 1      | 1              | 0      |       |
|                                       | * 144          | 2      | 0              | 0      |       |
|                                       | 145            | 1      | 1              | 0      |       |
|                                       | 146            | 0      | 0              | 1      |       |
|                                       | * 147          | 4      | 1              | 2      |       |
|                                       | 148            | 1      | 0              | 0      |       |
|                                       | 149            | 0      | 0              | 0      |       |
|                                       | * 150          | 3      | 1              | 0      |       |
|                                       | * 151          | 3      | 0              | 0      |       |
|                                       | 152            | 0      | 1              | 0      |       |
|                                       | 153            | 1      | 0              | 0      |       |
|                                       | 154            | 0      | 1              | 0      |       |
|                                       | 155            | 0      | 0              | 0      |       |
| <b>Total</b>                          | 19             | 8      | 2              | 3      | 32    |
| <b>PIP-box</b>                        | 14             | 3      | 2              | 3      | 22    |
| <b>Flanking (FI)</b>                  | 5              | 5      | 0              | 0      | 10    |
| <b>Conserved (*) PIP-box residues</b> | 9              | 2      | 1              | 2      | 14    |
| <b>Non-conserved PIP-box residues</b> | 2              | 1      | 1              | 1      | 5     |

**Other:** Intermolecular ionic interaction between B-Arg143 and A-Asp257; Intermolecular pi-stack between B-Tyr151 and A-Tyr250

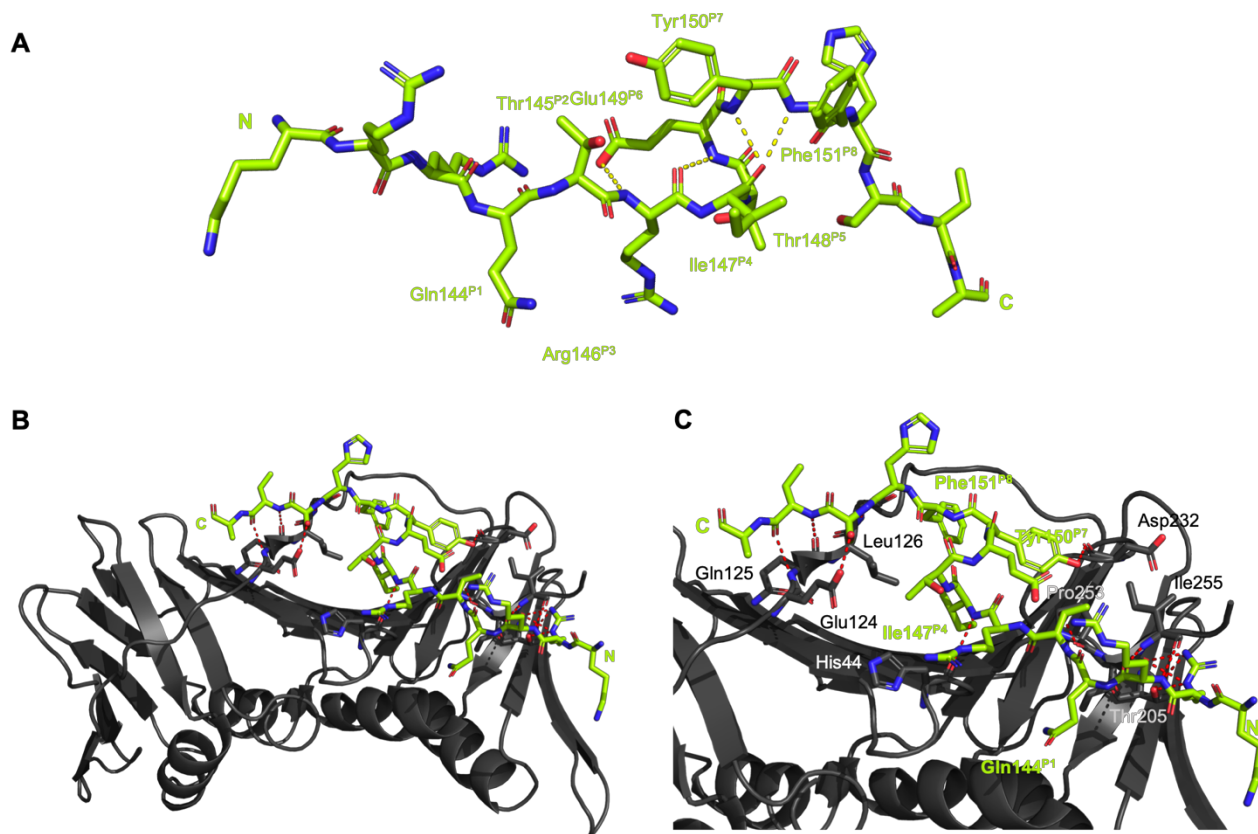

**Figure S14:** Computationally modelled structure of p21<sub>L</sub>-RD2 (green, sticks) on the PIP-box binding site of a hPCNA monomer (grey, cartoon). Heteroatoms indicated as blue, nitrogen; red, oxygen; yellow, sulfur. **A** Intramolecular interactions shown as yellow dashes, and PIP-box residues labelled in green. **B & C** Intermolecular interactions shown as red dashes, PCNA residues labelled in grey/white and conserved PIP-box residues labelled in green.

**Table S16:** Secondary Interaction Summary for computationally modelled structured of p21<sub>L</sub>-RD2 with hPCNA calculated using the RING server. Chain B interactions only. RING Session ID: [5f3b1ff30e9f94078ea22cfa](https://ring-server.org/session/5f3b1ff30e9f94078ea22cfa)

| Residue                               | Intermolecular |        | Intramolecular |        | Total |
|---------------------------------------|----------------|--------|----------------|--------|-------|
|                                       | VDW            | H-Bond | VDW            | H-Bond |       |
| FI                                    | 141            | 0      | 0              | 0      |       |
|                                       | 142            | 2      | 0              | 0      |       |
|                                       | 143            | 0      | 0              | 0      |       |
| PIP-box                               | * 144          | 1      | 0              | 0      |       |
|                                       | 145            | 1      | 0              | 0      |       |
|                                       | 146            | 2      | 1              | 0      |       |
|                                       | * 147          | 7      | 1              | 1      |       |
|                                       | 148            | 1      | 0              | 0      |       |
|                                       | 149            | 0      | 0              | 0      |       |
|                                       | * 150          | 2      | 1              | 0      |       |
|                                       | * 151          | 2      | 0              | 0      |       |
| FI                                    | 152            | 0      | 0              | 0      |       |
|                                       | 153            | 0      | 0              | 0      |       |
|                                       | 154            | 2      | 1              | 0      |       |
|                                       | 155            | 0      | 1              | 0      |       |
| <b>Total</b>                          | 20             | 9      | 1              | 3      | 33    |
| <b>PIP-box</b>                        | 16             | 4      | 1              | 3      | 24    |
| <b>Flanking (FI)</b>                  | 4              | 5      | 0              | 0      | 9     |
| <b>Conserved (*) PIP-box residues</b> | 10             | 2      | 1              | 2      | 15    |
| <b>Non-conserved PIP-box residues</b> | 4              | 2      | 0              | 1      | 7     |
| <b>Other:</b>                         |                |        |                |        |       |



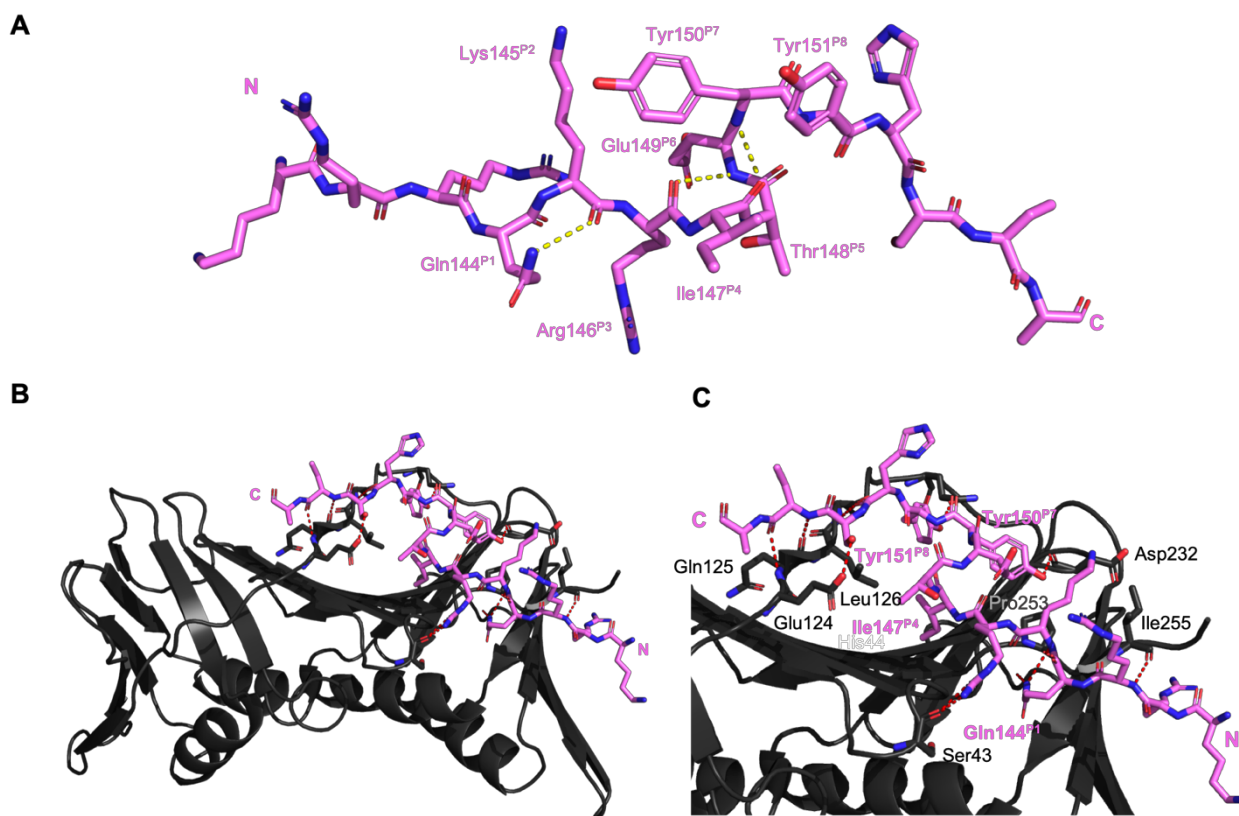

**Figure S15:** Computationally modelled structure of p21<sub>μ</sub>-RD3 (pink, sticks) on the PIP-box binding site of a hPCNA monomer (grey, cartoon). Heteroatoms indicated as blue, nitrogen; red, oxygen; yellow, sulfur. **A** Intramolecular interactions shown as yellow dashes, and PIP-box residues labelled in pink. **B & C** Intermolecular interactions shown as red dashes, PCNA residues labelled in grey/white and conserved PIP-box residues labelled in pink.

**Table S17:** Secondary Interaction Summary for computationally modelled structure of p21<sub>μ</sub>-RD3 with hPCNA calculated using the RING server. Chain B interactions only. RING Session ID: [5f3b22e70e9f94078ea22d04](https://www.rcsb.org/structure/5f3b22e70e9f94078ea22d04)

|         | Residue                               | Intermolecular |        | Intramolecular |        | Total |
|---------|---------------------------------------|----------------|--------|----------------|--------|-------|
|         |                                       | VDW            | H-Bond | VDW            | H-Bond |       |
| FI      | 141                                   | 0              | 0      | 0              | 0      |       |
|         | 142                                   | 2              | 1      | 0              | 0      |       |
|         | 143                                   | 2              | 2      | 0              | 0      |       |
| PIP-box | * 144                                 | 1              | 0      | 0              | 0      |       |
|         | 145                                   | 0              | 0      | 2              | 0      |       |
|         | 146                                   | 2              | 1      | 0              | 1      |       |
|         | * 147                                 | 5              | 0      | 0              | 2      |       |
|         | 148                                   | 1              | 0      | 0              | 0      |       |
|         | 149                                   | 0              | 0      | 0              | 0      |       |
|         | * 150                                 | 2              | 1      | 0              | 0      |       |
|         | * 151                                 | 2              | 1      | 0              | 0      |       |
| FI      | 152                                   | 0              | 1      | 0              | 0      |       |
|         | 153                                   | 2              | 0      | 0              | 0      |       |
|         | 154                                   | 0              | 1      | 0              | 0      |       |
|         | 155                                   | 0              | 0      | 0              | 0      |       |
|         | <b>Total</b>                          | 19             | 8      | 2              | 3      | 32    |
|         | <b>PIP-box</b>                        | 13             | 3      | 2              | 3      | 21    |
|         | <b>Flanking (FI)</b>                  | 6              | 5      | 0              | 0      | 11    |
|         | <b>Conserved (*) PIP-box residues</b> | 8              | 1      | 0              | 2      | 11    |
|         | <b>Non-conserved PIP-box residues</b> | 3              | 1      | 2              | 1      | 7     |
|         | <b>Other:</b>                         |                |        |                |        |       |

## ANALYSIS OF STRUCTURES

**Table S18:** Root-mean-squared deviation (RMSD) values of mutant peptides docked to the monomer of hPCNA compared to structures of p21<sub>μ</sub> bound to hPCNA and p21 bound to hPCNA.

| Name                                   | Structure Type      | RMSD value against Wild Type p21 <sub>139-160</sub> (monomer of 1AXC) | RMSD value against monomer of p21 <sub>μ</sub> bound to hPCNA (PDB ID: 7KQ1) |
|----------------------------------------|---------------------|-----------------------------------------------------------------------|------------------------------------------------------------------------------|
| p21 <sub>μ</sub>                       | Co-crystal – 7KQ1   | 0.511                                                                 | -                                                                            |
| p21 <sub>μ</sub>                       | Computational model | 0.316                                                                 | 0.233                                                                        |
| p21 <sub>μ</sub> -F150Y                | Co-crystal – 7KQ0   | 0.342                                                                 | 0.451                                                                        |
| p21 <sub>μ</sub> -S146R                | Computational model | 0.570                                                                 | 0.176                                                                        |
| p21 <sub>μ</sub> -M147I                | Computational model | 0.571                                                                 | 0.191                                                                        |
| p21 <sub>μ</sub> -D149E                | Computational model | 0.556                                                                 | 0.197                                                                        |
| p21 <sub>μ</sub> -FY150/151YF          | Computational model | 0.559                                                                 | 0.183                                                                        |
| p21 <sub>μ</sub> -PARG                 | Computational model | 0.571                                                                 | 0.192                                                                        |
| p21 <sub>μ</sub> -Pogo                 | Computational model | 0.554                                                                 | 0.271                                                                        |
| p21 <sub>μ</sub> -pol δ <sub>p66</sub> | Computational model | 0.559                                                                 | 0.186                                                                        |
| p21 <sub>μ</sub> -pol ι                | Computational model | 0.563                                                                 | 0.199                                                                        |
| p21 <sub>μ</sub> -RFC                  | Computational model | 0.567                                                                 | 0.209                                                                        |
| p21 <sub>μ</sub> -RD1                  | Computational model | 0.600                                                                 | 0.270                                                                        |
| p21 <sub>μ</sub> -RD2                  | Computational model | 0.558                                                                 | 0.181                                                                        |
| p21 <sub>μ</sub> -RD3                  | Computational model | 0.552                                                                 | 0.193                                                                        |

**Table S19:** Buried Surface Area (BSA) for PIP-box residues from the cocrystal structures and computationally modelled peptides calculated using the PDBePISA server v1.52 (<https://www.ebi.ac.uk/pdbe/pisa/>). Å<sup>2</sup> / Buried area percentage

| PIP-box Residue                        | 144 <sup>P1</sup> | 145 <sup>P2</sup> | 146 <sup>P3</sup> | 147 <sup>P4</sup> | 148 <sup>P5</sup> | 149 <sup>P6</sup> | 150 <sup>P7</sup> | 151 <sup>P8</sup> |
|----------------------------------------|-------------------|-------------------|-------------------|-------------------|-------------------|-------------------|-------------------|-------------------|
| Peptide                                |                   |                   |                   |                   |                   |                   |                   |                   |
| p21 (1AXC, Gulbis 1996)                | 107.86 / 70       | 48.31 / 70        | 30.39 / 60        | 135.10 / 100      | 47.60 / 60        | 0 / 0             | 59.31 / 50        | 132.20 / 90       |
| p21 <sub>μ</sub> (7KQ1)                | 98.61 / 70        | 46.23 / 70        | 31.97 / 60        | 140.61 / 100      | 34.23 / 40        | 0 / 0             | 66.67 / 50        | 130.92 / 90       |
| p21 <sub>μ</sub> -F150Y (7KQ0)         | 105.46 / 70       | 45.61 / 70        | 32.11 / 60        | 134.21 / 100      | 42.33 / 50        | 0 / 0             | 73.82 / 60        | 128.04 / 100      |
| p21 <sub>μ</sub> -S146R                | 93.41 / 70        | 46.73 / 70        | 68.11 / 50        | 142.96 / 100      | 32.99 / 40        | 0 / 0             | 74.02 / 60        | 133.52 / 90       |
| p21 <sub>μ</sub> -M147I                | 102.47 / 60       | 35.07 / 60        | 28.13 / 50        | 129.11 / 100      | 54.96 / 60        | 0 / 0             | 81.05 / 60        | 142.77 / 100      |
| p21 <sub>μ</sub> -D149E                | 98.26 / 60        | 50.34 / 80        | 29.24 / 50        | 140.27 / 100      | 42.59 / 50        | 0 / 0             | 75.43 / 60        | 136.21 / 100      |
| p21 <sub>μ</sub> -FY150/151YF          | 105.76 / 70       | 56.32 / 70        | 25.76 / 50        | 139.54 / 100      | 43.9 / 50         | 0 / 0             | 88.7 / 60         | 115.46 / 90       |
| p21 <sub>μ</sub> -PARG                 | 37.43 / 30        | 60.13 / 80        | 60.46 / 50        | 126.43 / 100      | 50.59 / 60        | 0 / 0             | 66.62 / 50        | 117.12 / 100      |
| p21 <sub>μ</sub> -Pogo                 | 73.05 / 60        | 71.12 / 60        | 53.08 / 50        | 131.07 / 100      | 62.18 / 60        | 0 / 0             | 83.77 / 60        | 120.27 / 90       |
| p21 <sub>μ</sub> -pol δ <sub>p66</sub> | 98.14 / 60        | 50.67 / 50        | 26.13 / 40        | 123.79 / 100      | 57.64 / 60        | 0 / 0             | 65.75 / 50        | 123.84 / 90       |
| p21 <sub>μ</sub> -pol ι                | 88.44 / 50        | 33.75 / 70        | 46.18 / 50        | 142.62 / 100      | 59.19 / 70        | 0 / 0             | 97.25 / 60        | 74.44 / 60        |
| p21 <sub>μ</sub> -RFC                  | 76.16 / 40        | 86.28 / 60        | 23.01 / 40        | 138.71 / 100      | 85.43 / 50        | 0 / 0             | 62.59 / 60        | 96.61 / 70        |
| p21 <sub>μ</sub> -RD1                  | 99.56 / 60        | 56.85 / 40        | 55.85 / 50        | 143.05 / 100      | 77.77 / 60        | 0 / 0             | 81.89 / 60        | 127.73 / 90       |
| p21 <sub>μ</sub> -RD2                  | 72.88 / 50        | 57.05 / 90        | 65.92 / 50        | 136.97 / 100      | 52.52 / 50        | 0 / 0             | 76.75 / 50        | 104.72 / 100      |
| p21 <sub>μ</sub> -RD3                  | 88.02 / 80        | 22.38 / 20        | 63.49 / 50        | 137.11 / 100      | 60.31 / 80        | 0 / 0             | 75.71 / 50        | 123.64 / 90       |

## COMPARISON OF STRUCTURES TO NATIVE SEQUENCES

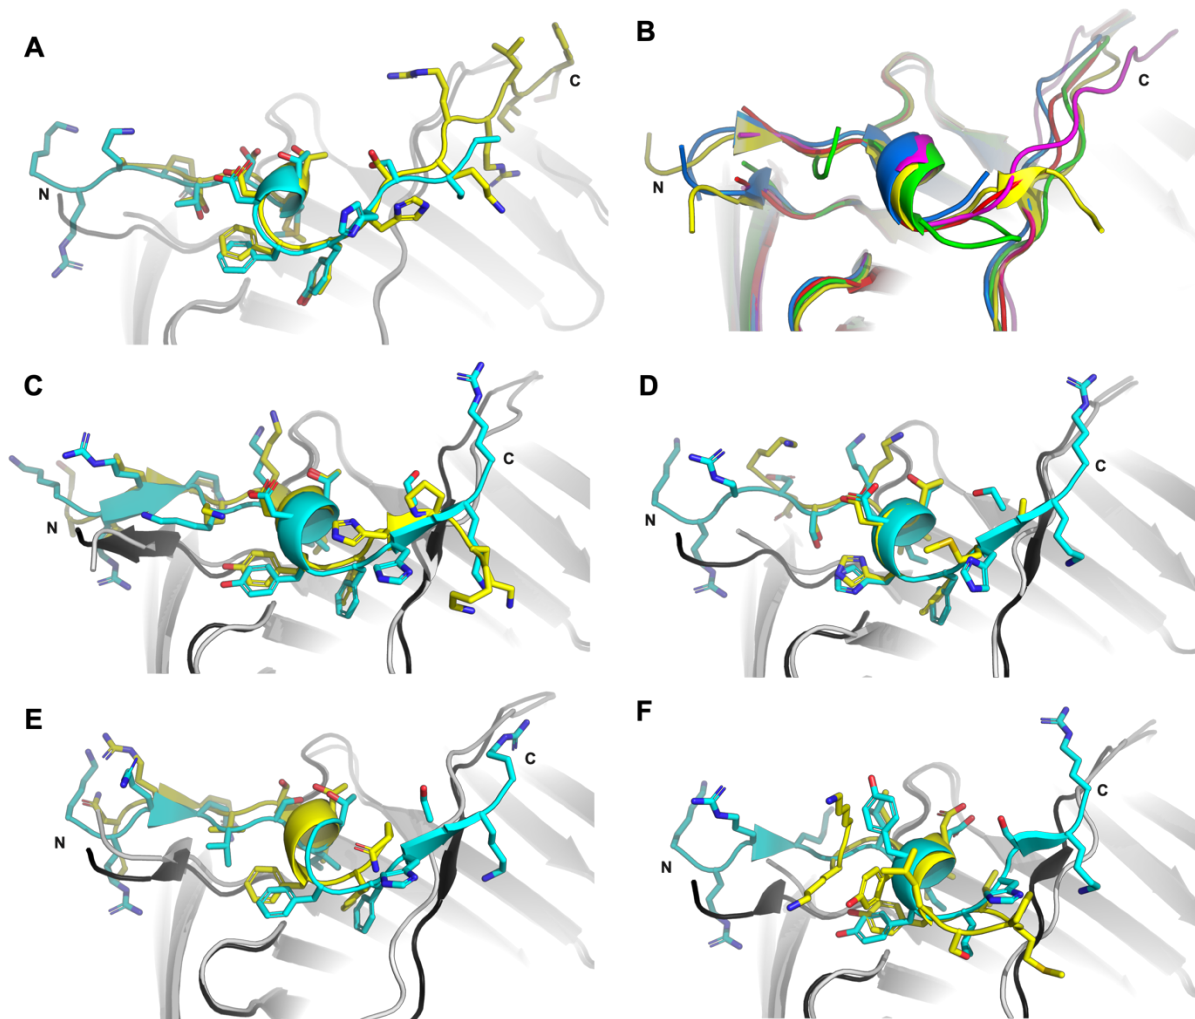

**Figure S16:** Overlaid structures of p21 $\mu$ :PIP-box hybrid (PCNA, white; peptide, blue) and native PIP-box peptide (PCNA, black; peptide, yellow) shown in cartoon representation and side-chains of peptide as sticks. **A** p21 $\mu$  (7KQ1) and p21<sup>139-160</sup> (1AXC) **B** Overlay of Native PIP-box peptides (p21<sup>139-160</sup> 1AXC, pink; PL 1VYJ, yellow; pol  $\delta_{p66}$  452-466 1U76, blue; PARG<sup>402-420</sup> 5MAV, red; pol I <sup>415-437</sup> 2ZVM, green **C** p21 $\mu$ -Pogo and PL (IVYJ) **D** p21 $\mu$ -PARG and PARG<sup>402-420</sup> (5MAV) **E** p21 $\mu$ -pol  $\delta$  and pol  $\delta_{p66}$  452-466 (1U76) **F** p21 $\mu$ - pol I and pol I <sup>415-437</sup> (2ZVM).

**Table S20:** Root-mean-squared deviation (RMSD) values of alternative PIP-box modified peptides docked to monomer of hPCNA compared to the structures of their respective native peptides bound to hPCNA

| Alternative PIP box mutant peptide docked to hPCNA | Structure of native peptide bound to hPCNA | RMSD value |
|----------------------------------------------------|--------------------------------------------|------------|
| p21 $\mu$ -PARG                                    | 5MAV                                       | 0.496      |
| p21 $\mu$ -Pogo                                    | 1VYJ                                       | 0.646      |
| p21 $\mu$ -pol $\delta_{p66}$                      | 1U76                                       | 0.696      |
| p21 $\mu$ -pol I                                   | 2ZVM                                       | 1.136      |

**Table S21:** Number of interactions for p21 $\mu$ :hybrid peptides compared to native analogues determined from co-crystal or computationally modelled structures with RING server. For native structures the interactions are averaged over all subunit present in the pdb coordinate file.

| Peptide                       | PDB ID: | Ref. | Affinity     | # res | # Interactions |         |           |               |          | RING (3) session ID                       |
|-------------------------------|---------|------|--------------|-------|----------------|---------|-----------|---------------|----------|-------------------------------------------|
|                               |         |      |              |       | Total          | PIP-box | Conserved | Non-conserved | Flanking |                                           |
| p21 <sup>139-160</sup>        | 1AXC    | (4)  | 5.96 nM      | 22    | 60.67          | 25      | 9.33      | 15.67         | 35.67    | <a href="#">5ef515200e9f94078ea226cb</a>  |
| p21 $\mu$                     | 7KQ1    |      | 26.1 nM      | 15    | 30.67          | 23.67   | 16.67     | 7             | 7        | <a href="#">5ef50f2b0e9f94078ea226bd</a>  |
| PL <sup>1-16</sup> [mutant]   | 1VYJ    | (5)  | 100 nM       | 16    | 22.33          | 17.67   | 13.33     | 4.33          | 4.67     | <a href="#">5ef515730e9f94078ea226cc</a>  |
| p21 $\mu$ -Pogo               |         |      | 9.12 nM      | 15    | 34             | 24      | 16        | 5             | 10       | <a href="#">5f3b224d0e9f94078ea22d01</a>  |
| pol $\delta_{p66}$ 452-466    | 1U76    | (6)  | 15.6 $\mu$ M | 15    | 30.33          | 24.33   | 17        | 7.33          | 6        | <a href="#">5ef516b50e9f94078ea226cf</a>  |
| p21 $\mu$ -pol $\delta_{p66}$ |         |      | 268 nM       | 15    | 29             | 16      | 11        | 3             | 13       | <a href="#">5f3b202a0e9f94078ea226cfb</a> |
| PARG <sup>402-420</sup>       | 5MAV    | (7)  | 3.3 $\mu$ M  | 19    | 26             | 19      | 4.83      | 14.17         | 7        | <a href="#">5ef5164c0e9f94078ea226ce</a>  |
| p21 $\mu$ -PARG               |         |      | 401 nM       | 15    | 24             | 15      | 8         | 4             | 9        | <a href="#">5f3b1de50e9f94078ea226cf7</a> |
| pol I <sup>415-437</sup>      | 2ZVM    | (8)  | 0.39 $\mu$ M | 23    | 22.33          | 17.67   | 17.67     | 4.67          | 4.67     | <a href="#">5ef515e00e9f94078ea226cd</a>  |
| p21 $\mu$ -pol I              |         |      | 1.42 $\mu$ M | 15    | 26             | 16      | 9         | 7             | 10       | <a href="#">5f3b1e580e9f94078ea226cf8</a> |

## REFERENCES

1. Anthis, N. J., and Clore, G. M. (2013) Sequence-specific determination of protein and peptide concentrations by absorbance at 205 nm. *Protein Sci.* **22**, 851-858
2. Wlodawer, A., Minor, W., Dauter, Z., and Jaskolski, M. (2013) Protein crystallography for aspiring crystallographers or how to avoid pitfalls and traps in macromolecular structure determination. *FEBS J.* **280**, 5705-5736
3. Piovesan, D., Minervini, G., and Tosatto, S. C. (2016) The RING 2.0 web server for high quality residue interaction networks. *Nucleic Acids Res.* **44**, W367-374
4. Gulbis, J. M., Kelman, Z., Hurwitz, J., O'Donnell, M., and Kuriyan, J. (1996) Structure of the C-Terminal Region of p21 WAF1/CIP1 Complexed with Human PCNA. *Cell* **87**, 297-306
5. Kontopidis, G., Wu, S.-Y., Zheleva, D. I., Taylor, P., McInnes, C., Lane, D. P., Fischer, P. M., and Walkinshaw, M. D. (2005) Structural and biochemical studies of human proliferating cell nuclear antigen complexes provide a rationale for cyclin association and inhibitor design. *Proc. Natl. Acad. Sci. U. S. A.* **102**, 1871-1876
6. Bruning, J. B., and Shamooy, Y. (2004) Structural and thermodynamic analysis of human PCNA with peptides derived from DNA polymerase-delta p66 subunit and flap endonuclease-1. *Structure* **12**, 2209-2219
7. Kaufmann, T., Grishkovskaya, I., Polyansky, A. A., Kostrhon, S., Kukulj, E., Olek, K. M., Herbert, S., Beltzung, E., Mechtler, K., Peterbauer, T., Gotzmann, J., Zhang, L., Hartl, M., Zagrovic, B., Elsayad, K., Djinovic-Carugo, K., and Slade, D. (2017) A novel non-canonical PIP-box mediates PARG interaction with PCNA. *Nucleic Acids Res.* **45**, 9741-9759
8. Hishiki, A., Hashimoto, H., Hanafusa, T., Kamei, K., Ohashi, E., Shimizu, T., Ohmori, H., and Sato, M. (2009) Structural basis for novel interactions between human translesion synthesis polymerases and proliferating cell nuclear antigen. *J. Biol. Chem.* **284**, 10552-10560
